# Supplementary material for: Differentiation between mycoplasma and viral community-acquired pneumonia in children with lobe or multi foci infiltration: a retrospective case study
Source: PubMed Central journal article supplement — BMJ Open. 2015 Jan 15;5(1):e006766. doi: 10.1136/bmjopen-2014-006766 (PMC4298093; doi:10.1136/bmjopen-2014-006766), 2015-01-15
Supplement: bmjopen-2014-006766.draft_revisions.pdf [file bmjopen-2014-006766.draft_revisions.pdf]

# BMJ Open

## Differentiation between Mycoplasma and viral community-acquired pneumonia in children with lobe or multi foci infiltration

|                                 |                                                                                                                                                                                                                                                                                                                                                                                                          |
|---------------------------------|----------------------------------------------------------------------------------------------------------------------------------------------------------------------------------------------------------------------------------------------------------------------------------------------------------------------------------------------------------------------------------------------------------|
| Journal:                        | <i>BMJ Open</i>                                                                                                                                                                                                                                                                                                                                                                                          |
| Manuscript ID:                  | bmjopen-2014-006766                                                                                                                                                                                                                                                                                                                                                                                      |
| Article Type:                   | Research                                                                                                                                                                                                                                                                                                                                                                                                 |
| Date Submitted by the Author:   | 01-Oct-2014                                                                                                                                                                                                                                                                                                                                                                                              |
| Complete List of Authors:       | Guo, Wan-liang; the Children's Hospital Affiliated to Soochow University, Radiology department<br>Wang, Jian; the Children's Hospital Affiliated to Soochow University, General surgery department<br>Zhu, Li-yuan; the Children's Hospital Affiliated to Soochow University, Respiratory department<br>Hao, Chuang-li; the Children's Hospital Affiliated to Soochow University, Respiratory department |
| <b>Primary Subject Heading</b>: | Paediatrics                                                                                                                                                                                                                                                                                                                                                                                              |
| Secondary Subject Heading:      | Infectious diseases, Paediatrics, Radiology and imaging                                                                                                                                                                                                                                                                                                                                                  |
| Keywords:                       | Paediatric radiology < PAEDIATRICES, Paediatric thoracic medicine < PAEDIATRICES, Paediatric infectious disease & immunisation < PAEDIATRICES                                                                                                                                                                                                                                                            |
|                                 |                                                                                                                                                                                                                                                                                                                                                                                                          |

SCHOLARONE™  
Manuscripts

only

1  
2  
3  
4 **Differentiation between Mycoplasma and viral community-acquired pneumonia**  
5  
6 **in children with lobe or multi foci infiltration**  
7

8 **Wan-liang Guo\*<sup>a</sup>, Jian Wang\*<sup>b</sup>, Li-yuan Zhu<sup>c</sup>, Chuang-li Hao\*\*<sup>c</sup>**  
9

10 **<sup>a</sup> Radiology department, the Children's Hospital Affiliated to Soochow University,**  
11 **Suzhou , China.215003**

12 **<sup>b</sup> General surgery department, the Children's Hospital Affiliated to Soochow**  
13 **University, Suzhou , China.215003, China.215003**

14 **<sup>c</sup> Respiratory department, the Children's Hospital Affiliated to Soochow**  
15 **University, Suzhou , China.215003, China.215003**

16 **\* co-first author**

17 **\*\*Correspondence authors: Chuang-li Hao, Phone:+8615950011521,**

18 **Fax:+8651265224492, E-mail:clhaosuzhou@163.com**  
19  
20  
21  
22  
23  
24  
25  
26  
27  
28  
29  
30

31 **Objectives:** The aim of this paper seeks to analyze the clinical features, inflammatory  
32 markers, and radiographs of community-acquired pneumonia (CAP) cases with lobe  
33 or multi foci infiltration; with a special focus on factors which allow the differential  
34 diagnosis of viral and mycoplasma pneumonia.  
35  
36  
37  
38  
39

40 **Setting :**This is a retrospective chart review of CAP cases in a large University  
41 teaching hospital..  
42  
43  
44  
45

46 **Participants:** 126 pediatric CAP cases, with lobe or multi foci infiltration, presenting  
47 between May 2012 and April 2013. Demographic data, clinical presentation upon  
48 admission or referral, laboratory tests, prior history, and radiography were collected  
49 for each case if available.  
50  
51  
52  
53  
54  
55

56 **Primary and secondary outcome measures:** We used univariate and multivariate  
57  
58  
59  
60

1  
2  
3  
4 logistic regression to determine the significant factors which allow the differential  
5  
6 diagnosis of viral and mycoplasma CAP with lobar or multi foci infiltration.  
7

8  
9 **Results:** Overall, there were 71 (56%) male and 55 (44%) female CAP cases with  
10  
11 lobar or multi foci infiltration. Seventy pneumonia cases were caused by mycoplasma  
12  
13 pneumoniae and eighteen by viruses. Univariate analysis of the mycoplasma and viral  
14  
15 causes of the CAP revealed that increased respiratory rate, wheeze, male gender, and  
16  
17 lymphocyte percentage were the factors associated with the differentiation of  
18  
19 mycoplasma and viral etiologies of pneumonia ( $P<0.05$ ). A stepwise logistic  
20  
21 regression analysis was performed to assess independent factors which allow the  
22  
23 differential diagnosis of viral and mycoplasma pneumonia. Increased respiratory rate,  
24  
25 wheeze, and lymphocyte percentage were reliable independent factors which allow  
26  
27 the differential diagnosis of viral and mycoplasma CAP with lobar or multi foci  
28  
29 infiltration.  
30  
31  
32  
33  
34

35  
36 **Conclusions:** Whether the CAP with lobar or multi foci infiltration was caused by  
37  
38 Mycoplasma species or viruses could not be inferred from the radiological patterns.  
39  
40 Wheeze, lymphocyte percentage, and respiratory rate were independent factors which  
41  
42 allowed the differential diagnosis of viral and mycoplasma CAP with lobar or multi  
43  
44 foci infiltration.  
45  
46  
47  
48  
49

50  
51 **Keywords:** Community-acquired pneumonia; Children; lobar; multi foci; etiology  
52  
53  
54

55  
56 **Strengths and limitations of this study**  
57  
58  
59  
60

1  
2  
3  
4 Over a period of 1 year, a retrospective study was carried out in our hospital. A  
5  
6 stepwise logistic regression analysis of 88 cases was performed to assess independent  
7  
8 predictors which allowed the differential diagnosis of viral and mycoplasma caused  
9  
10 CAP. Increased respiratory rate, wheeze and lymphocyte percentage were  
11  
12 significantly predictive regarding the differentiation between viral and mycoplasma  
13  
14 caused CAP with lobar or multi foci infiltration, as was viral aetiology of CAP with  
15  
16 lobar or multi foci infiltration, increase respiratory rate, wheeze and increase  
17  
18 lymphocyte percentage.  
19  
20  
21  
22

23  
24 This study has several limitations. Firstly, it was a retrospective study, and  
25  
26 therefore there may have been some selection bias. Secondly, there may be some  
27  
28 cases in which the patient had a viral as well as bacterial or a combined bacterial and  
29  
30 mycoplasma infection which cannot be detected. Therefore, prospective further,  
31  
32 preferably prospective studies on CAP with lobar or multi foci infiltration are needed.  
33  
34  
35  
36  
37  
38

### 39 **Introduction**

40  
41 For the pediatric population, community-acquired pneumonia (CAP) is among the  
42  
43 most frequent causes of hospital admission. CAP remains a major cause of morbidity  
44  
45 and mortality worldwide, especially regarding children less than 5 years of age. Most  
46  
47 children with CAP live in the developing countries [1]. Viruses and Mycoplasma  
48  
49 species are to main of the many pathogenic agents which can cause CAP [2, 3, 4].  
50  
51  
52

53  
54 The symptoms of Community-acquired pneumonia are varying considerably,  
55  
56 depending on their aetiology, its infection pattern, and the underlying medical  
57  
58  
59  
60

1  
2  
3  
4 conditions. In clinical practice, most of the CAP diagnoses are based on radiography  
5  
6 and clinical symptoms. There are some report cases in which the etiologies of CAPs  
7  
8 were established on the bases clinical signs, radiological findings, or non-specific  
9  
10 inflammatory serum markers [5, 6, 7]. In radiography, Most of CAP cases are  
11  
12 diagnosed as bronchopneumonia. However, lobe or multi foci infiltration is the other  
13  
14 two important kinds of CAP in clinical.  
15  
16

17  
18 Both viruses as well as Mycoplasma species can lead to lobe or multi foci  
19  
20 infiltration in CAP. The therapy strategy for CAP cases is as controversial as it is  
21  
22 crucial. The use of antibiotics before the etiology is found out is debated. On the other  
23  
24 hand, to establish the cause of CAP cases needs time. Hence, tests must be devised  
25  
26 which allow an early differentiation between viral and mycoplasma pneumonia.  
27  
28 Unfortunately, studies focusing on CAP with lobe or multi foci infiltration are yet to  
29  
30 be carried out.  
31  
32  
33  
34

35  
36 Therefore, from May, 2012 to May, 2013, over a period of 1 year, a retrospective  
37  
38 study was carried out in our hospital to examine the clinical features, inflammatory  
39  
40 markers (C-Reactive Protein, white blood cell counting , and lymphocyte percentage),  
41  
42 and radiographs of CAP cases with lobe or multi foci infiltration; with a special focus  
43  
44 on factors which would allow the differential diagnosis of viral and mycoplasma  
45  
46 pneumonia.  
47  
48  
49

## 50 51 **Materials and Methods**

### 52 53 ***Study Subjects***

54  
55  
56 This study was approved by the Institutional Review Board of our Hospital.  
57  
58  
59  
60

1  
2  
3  
4 Informed consent was enrolled and written by the parents of all children. During a  
5  
6 surveillance period of 12 months (from May, 2012 to April, 2013), 126 consecutive,  
7  
8 previously healthy children with radiologically confirmed lobar or multi foci  
9  
10 infiltration of the lung were treated at our Hospital.  
11  
12

13  
14 Demographic data, clinical presentation upon admission or referral, laboratory tests,  
15  
16 prior history, and radiography were collected for each case if available. Decisions on  
17  
18 tests prescription, radiograph, and confirmatory cultures were made at the discretion  
19  
20 of the attending physicians.  
21  
22

23  
24 The respiratory rates of the 126 patients were measured: they were age-related; The  
25  
26 respiratory rate was less than 45 per minute in children younger than 28 days old, less  
27  
28 than 40 per minute in children between 29 days and 1 year old, less than 30 per  
29  
30 minute in children between 1 and 3 years old, less than 25 per minute in children  
31  
32 between 4 and 7 years old, and less than 20 per minute in children older than 8 years.  
33  
34

35  
36 Nasopharyngeal swab specimens were routinely collected within 24 hours of  
37  
38 admission, and bronchial-aspirate samples were obtained after tracheal intubation.  
39  
40 Respiratory specimens were tested for influenza A and B, adenovirus, respiratory  
41  
42 syncytial virus(RSV), bokavirus, human metapneumovirus (hMPV),  
43  
44 and parainfluenza virus( PIFV) 1, 2, and 3; using direct immunofluorescence assays.  
45  
46

47  
48 Viral pneumonia was defined as acute respiratory disease with abnormal chest  
49  
50 radiograph findings and positive laboratory tests for one of the aforementioned viruses.  
51  
52 In addition, blood specimens were obtained within 24 hours of admission for bacterial  
53  
54 cultures. Other blood tests, including for C-reactive protein (CRP), white blood cells,  
55  
56  
57  
58  
59  
60

1  
2  
3  
4 and lymphocyte percentages and neutrophil percentages, were also performed.

5  
6 The diagnosis of Mycoplasma pneumonia was based on the results from real-time  
7  
8  
9 PCR targeting the P1 cytoadhesion type 1 and 2 genes of the Mycoplasma  
10  
11 pneumoniae genome, using DNA extracted from nasopharyngeal-swab specimens.  
12  
13 Mycoplasma pneumonia was defined as acute respiratory disease with abnormal chest  
14  
15 radiograph findings and positive laboratory tests combined by real-time PCR. Patients  
16  
17 with simultaneous viral and mycoplasma infections were excluded from this study.  
18  
19

### 20 21 ***Radiography***

22  
23 The symptoms typically occurred at 4-7 days before the chest radiographs, via an  
24  
25 anteroposterior projection with the child lying. Images was independently reviewed  
26  
27 by two radiologist, when there has different opinion, they reached a diagnostic  
28  
29 conclusion by consensus. Chest radiograph findings were classified as lobar(unilateral  
30  
31 or bilateral) or multi foci infiltration. The distribution of abnormalities was  
32  
33 categorized as focal, multi foci. A lobar distribution was defined as a single lobar of  
34  
35 abnormality. If there were two or more foci, the distribution of abnormality was  
36  
37 considered multi foci[3].  
38  
39  
40  
41  
42

### 43 44 ***Statistical Analysis***

45  
46 Data are presented as number (*n*) and percentage. Univariate comparisons were  
47  
48 made using nonparametric one-way Wilcoxon rank sum, chi-squared ( $\chi^2$ ), or Fisher's  
49  
50 exact tests; depending on the statistical distribution. To evaluate the ability to  
51  
52 differentiate between mycoplasma and viral CAP cases with lobar or multi foci  
53  
54 infiltration, a stepwise logistic regression analysis was performed with the statistical  
55  
56  
57  
58  
59  
60

1  
2  
3  
4 analysis software (SAS) 8. Probability values of P less than 0.05 were considered  
5  
6 statistically significant.  
7

## 8 9 **Results**

10  
11 Overall, there were 71 (56%) male and 55 (44%) female CAP cases with lobar or  
12  
13 multi foci infiltration. The median age of the 126 patients was 4 years (range, 1 day to  
14  
15 14 years). The presenting signs and symptoms were cough (97.6%), fever (47.6%),  
16  
17 increase of respiratory rate (55.6%), and wheeze (14.3%). Fever and increase of  
18  
19 respiratory rate are more common in the “over 5-year” group; however, wheeze is  
20  
21 more common in “under 23-month” group (see Table 1).  
22  
23

24  
25 Findings in chest radiograph included lobar consolidation (see Figure 1) in 54  
26  
27 patients (multiple), unilateral consolidation (see Figure 2) in 26 patients, and bilateral  
28  
29 consolidation (see Figure 3) in 46 patients. Seven patients had pleural effusions. An  
30  
31 analysis of the correlation between aetiology and radiography findings showed that  
32  
33 there were no significant differences between them ( $P>0.05$ ) (Table 2).  
34  
35  
36

37  
38 Seventy of the CAP cases were caused by Mycoplasma species and 18 by viruses,  
39  
40 including influenza A (n=2), influenza B (n=1), adenovirus (n=2), RSV (n=9),  
41  
42 bokavirus (n=2), and PIFV 3 (n=2). Univariate analysis revealed that the factors  
43  
44 which allowed the differential diagnosis of viral and mycoplasma CAP were increased  
45  
46 respiratory rate, wheeze, male, and lymphocyte percentage ( $P<0.05$ ). There were no  
47  
48 significant differences in age, radiological findings, fever, cough, CRP, and WBC  
49  
50 ( $P>0.05$ ) (see Table 3).  
51  
52  
53  
54

55  
56 A stepwise logistic regression analysis of 88 cases was performed to assess  
57  
58  
59  
60



1  
2  
3 independent predictors which allowed the differential diagnosis of viral and  
4  
5 mycoplasma caused CAP. Increased respiratory rate, wheeze and lymphocyte  
6  
7 percentage were significantly predictive regarding the differentiation between viral  
8  
9 and mycoplasma caused CAP with lobar or multi foci infiltration (see Table 4), as was  
10  
11 viral aetiology of CAP with lobar or multi foci infiltration, increase respiratory rate,  
12  
13 wheeze and increase lymphocyte percentage. The logistic regression model was  
14  
15 consistent with the findings reported by Hosmer and Lemeshow who used the  
16  
17 goodness-of-fit test ( $P=0.8979$ ).  
18  
19  
20  
21  
22  
23  
24  
25

## 26 Discussion

27  
28 In this study, 126 CAP cases with lobar or multi foci infiltration were observed  
29  
30 over a period of 1 year. About 19.8% of the CAP cases were caused by mycoplasma  
31  
32 species or virus. The etiology of 38 cases could not be detected, partly because the  
33  
34 positive of bacterial pathogens in blood culture is very low. Our results are very  
35  
36 similar to those of Zhang et al. who reported 707 severe CAP cases; blood cultures  
37  
38 were positive in only 5, i.e., 0.7% [2]. This means that new methods with higher  
39  
40 sensitivities for bacterial pathogens in blood must be devised which can be routinely  
41  
42 used in all laboratories (which is currently not the case) [8]. On the other hand, 55.6%  
43  
44 of our patients had tachypnoea and 47.6% had fever, and these symptoms were more  
45  
46 common in the “over 5-year” group. The CRP is higher in the “over 5-year” group  
47  
48 than in the other two groups; maybe more infiltration foci can be found in the over  
49  
50 5-year” group. Our results are similar to two other studies [9,10]. However wheeze is  
51  
52  
53  
54  
55  
56  
57  
58  
59  
60

1  
2  
3  
4 more common in the “below 23-month” group; this finding is different from that of a  
5  
6 recent study [11], partly because the sample we focus on pneumoniae with lobar or  
7  
8 multi foci infiltration.  
9

10  
11 In clinical practice, the radiographic detection of infiltrations is currently the gold  
12  
13 standard for the diagnosis of CAP. Most CAP cases are defined as bronchial  
14  
15 pneumonia in radiograph. However, lobe or multi foci infiltrations are the other two  
16  
17 radiological manifestations of CAP [3,11]. Some authors reported that in clinical  
18  
19 practice lobar infiltrations are often caused by bacteria [6]. However, in this study,  
20  
21 69.8% of the CAP case was caused by viruses and Mycoplasma species: especially,  
22  
23 mycoplasma associated with etiological findings, it account 55.6% in this group. This  
24  
25 finding is consistent with some previous studies [3,12]. In our study, there were 41  
26  
27 CAP cases with bilateral infiltrations and 61 CAP cases with multi foci. When  
28  
29 analysis on distribution and the number of focus. There is no significant difference  
30  
31 associating with etiological findings. Even some of cases with pleural effusion, there  
32  
33 is no significant difference associating with etiological findings. This means that  
34  
35 whether the CAP with lobar or multi foci infiltration was caused by Mycoplasma  
36  
37 species or viruses could not be inferred from the radiological patterns In a recent  
38  
39 study about pediatric CAP, Korppi et al. analyzed the clinical or radiological  
40  
41 characteristics of 101 CAP cases, and they concluded that radiographs are not helpful  
42  
43 when it comes to differentiating between viral, pneumococcal, and atypical bacterial  
44  
45 aetiology of CAP in children [11]. This conclusion coincides with our results:  
46  
47  
48  
49  
50  
51  
52  
53  
54

55  
56 Radiological pattern did not allow a reliable differentiation between mycoplasma and  
57  
58  
59  
60

1  
2  
3  
4 viral CAP.

5  
6 To investigate potential factors that may allow differentiating between viral and  
7  
8 mycoplasma CAP is very important for clinical practice. In this study, our aim was to  
9  
10 describe the utility of some laboratory markers and clinical features regarding the  
11  
12 differentiation between mycoplasma and viral CAP with lobar or multi foci  
13  
14 infiltrations. Univariate analysis showed that findings such wheeze, lymphocyte  
15  
16 percentage, respiratory rate, and sex can help to differentiate between mycoplasma  
17  
18 and viral CAP with lobar or multi foci infiltration. Furthermore, multiple logistic  
19  
20 regression showed that wheeze, increase of lymphocyte percentage, and increase of  
21  
22 respiratory rate are independent factors which allow to differentiate between  
23  
24 mycoplasma and viral CAP with lobar or multi focus infiltration. This means that  
25  
26 among mycoplasma and viral CAP with lobar or multi foci infiltration, wheeze,  
27  
28 increase of lymphocyte percentage, and increase of respiratory rate can help to  
29  
30 diagnose viral pneumonia.  
31  
32  
33  
34  
35  
36  
37  
38

39 Hatipoğlu et al. [13] reported 147 viral CAP cases, and they found that the  
40  
41 prominent symptoms of the patients were cough (88.9%) and wheeze (72.2%). This is  
42  
43 similar to our results. In another report [11], 101 CAP cases were analyzed. Although  
44  
45 the report lacked data on respiratory rate in 20 cases, it included supplementary  
46  
47 sensitivity analyses by adding the cases with missing data as non-tachypnoea cases in  
48  
49 the analyses. Moreover, the report concluded that tachypnoea is not associated with  
50  
51 the aetiology of CAP. The above study is different from our findings. The reason may  
52  
53 be that we used multiple factor analysis and selected mycoplasma and viral CAP with  
54  
55  
56  
57  
58  
59  
60

1  
2  
3  
4  
5  
6  
7  
8  
9  
10  
11  
12  
13  
14  
15  
16  
17  
18  
19  
20  
21  
22  
23  
24  
25  
26  
27  
28  
29  
30  
31  
32  
33  
34  
35  
36  
37  
38  
39  
40  
41  
42  
43  
44  
45  
46  
47  
48  
49  
50  
51  
52  
53  
54  
55  
56  
57  
58  
59  
60

lobar or multi foci infiltration as our object of study. We believe that our will have a significant impact on the efforts to find new treatment strategies for this type of CAP.

Youn et al. [9] reported 95 *Mycoplasma pneumoniae* cases with segmental or lobar infiltrations. They found that the lymphocyte percentage was at a normal level.

Defilippi et al. [10] reported 102 CAP cases with a positive PCR for *Mycoplasma pneumoniae*: they found that the lymphocyte percentage (median) is at normal level, a result similar to ours. Hatipoğlu et al. [13] reported 147 cases with pneumonia, the percentage of polymorphonuclear leukocytes the viral pneumonia cases was lower than patients Virus not isolated, it suggests that Lymphocyte percentage may be higher in pneumonian in acute phase of pneumonia. The above-mentioned literature suggests that viral pneumonia often presents a higher percentage of lymphocyte. This conclusion is similar to our results.

This study has several limitations. Firstly, it was a retrospective study, and therefore there may have been some selection bias. Secondly, there may be some cases in which the patient had a viral as well as bacterial or a combined bacterial and mycoplasma infection which cannot be detected. Therefore, prospective further, preferably prospective studies on CAP with lobar or multi foci infiltration are needed.

In conclusion, more than half of the CAP cases with lobar or multi foci infiltration are caused by *Mycoplasma* species or viruses. Whether the CAP with lobar or multi foci infiltration was caused by *Mycoplasma* species or viruses could not be inferred from the radiological patterns. We found that wheeze, lymphocyte percentage, and respiratory rates were independent factors which allow the differential diagnosis of

1  
2  
3  
4 viral and mycoplasma caused CAP with lobar or multi foci infiltration.  
5  
6  
7

8  
9 **Reference:**

10  
11 [1] Rudan I, Boschi-Pinto C, Biloglav Z, et al. Epidemiology and etiology of  
12  
13 childhood pneumonia. Bull World Health Organ 2008;86(5):408-16.  
14

15  
16 [2] Zhang Q1, Guo Z, Bai Z, et al. A 4 year prospective study to determine risk  
17  
18 factors for severe community acquired pneumonia in children in southern China.  
19  
20  
21  
22  
23  
24  
25  
26  
27  
28  
29  
30  
31  
32  
33  
34  
35  
36  
37  
38  
39  
40  
41  
42  
43  
44  
45  
46  
47  
48  
49  
50  
51  
52  
53  
54  
55  
56  
57  
58  
59  
60  
Pediatr Pulmonol 2013;48(4):390-7.

[3] Guo W1, Wang J, Sheng M, et al. Radiological findings in 210 paediatric  
patients with viral pneumonia: a retrospective case study. Br J Radiol  
2012;85(1018):1385-9.

[4] Cardinale F1, Cappiello AR, Mastrototaro MF, et al. Community-acquired  
pneumonia in children. Early Hum Dev 2013;89 Suppl 3:S49-52.

[5] Don M, Valent F, Korppi M, et al. Differentiation of bacterial and viral  
community-acquired pneumonia in children. Pediatr Int 2009;51(1):91-6.

[6] Virkki R, Juven T, Rikalainen H, et al. Differentiation of bacterial and viral  
pneumonia in children. Thorax 2002;57(5):438-41.

[7] Korppi M. Non-specific host response markers in the differentiation between  
pneumococcal and viral pneumonia: what is the most accurate combination? Pediatr  
Int 2004;46(5):545-50.

[8] Esposito S, Marchese A, Tozzi AE, et al. Bacteremic pneumococcal  
community-acquired pneumonia in children less than 5 years of age in Italy. Pediatr

1  
2  
3  
4 Infect Dis J 2012;31(7):705-10.

5  
6 [9] Youn YS, Lee KY, Hwang JY, et al. Difference of clinical features in childhood  
7  
8 Mycoplasma pneumoniae pneumonia. BMC Pediatr 6;10:48.

9  
10  
11 [10] Defilippi A, Silvestri M, Tacchella A, et al. Epidemiology and clinical features  
12  
13 of Mycoplasma pneumoniae infection in children. Respir Med 2008; 102(12):1762-8.

14  
15 [11] Korppi M, Don M, Valent F, et al. The value of clinical features in  
16  
17 differentiating between viral, pneumococcal and atypical bacterial pneumonia in  
18  
19 children. Acta Paediatr 2008;97(7):943-7.

20  
21 [12] Lee I, Kim TS, Yoon HK. Mycoplasma pneumoniae pneumonia: CT features  
22  
23 in 16 patients. Eur Radiol 2006; 16(3):719-25.

24  
25 [13] Hatipoğlu N1, Somer A, Badur S, et al. Ünüvar E. Viral etiology in hospitalized  
26  
27 children with acute lower respiratory tract infection. Turk J Pediatr  
28  
29  
30  
31  
32  
33  
34 2011;53(5):508-16.

## Figure Legends

Figure 1. An example of right middle lobe consolidation from a chest radiograph obtained 6 days after the onset of symptoms in a 5-month-old girl with influenza B.

Figure 2. An example of right upper and middle lobe consolidation from a chest radiograph obtained 5 days after the onset of symptoms in a 2-year-old girl with MB.

Figure 3. An example of bilateral consolidation in the left upper zone, the right upper zone and middle zone from a chest radiograph taken 4 days after the onset of symptoms in a 16-month-old girl with influenza A.

**Table 1** Clinical signs and symptoms in 126 children with community-acquired pneumonia, in relation to the age

| Symptoms                          | 0–23<br>months | 2–4<br>years | ≥5 years | p-value | total |
|-----------------------------------|----------------|--------------|----------|---------|-------|
| sex(M)                            | 24             | 16           | 31       | 0.0364  | 71    |
| Fever >37,5°C                     | 7              | 22           | 31       | 0.0011  | 60    |
| wheeze                            | 13             | 2            | 3        | <0.0001 | 18    |
| Increase respiratory rate         | 12             | 17           | 41       | 0.0001  | 70    |
| cough                             | 32             | 38           | 53       | 0.2131  | 123   |
| CRP(>8)                           | 10             | 27           | 39       | <0.0001 | 76    |
| Unilateral consolidation(single)  | 11             | 18           | 25       | 0.9524  | 54    |
| Unilateral consolidation(multipe) | 5              | 8            | 13       | 0.9524  | 26    |
| Bilateral consolidation           | 18             | 13           | 15       | 0.0587  | 46    |
| Pleural fluid                     | 1              | 2            | 4        | 0.8847  | 7     |
| total                             | 34             | 39           | 53       | -       | 126   |

**Table 2.** Radiological findings in children with large considation of CAP

| Radiological findings             | M  | V | unknow | P-value | Total patients |
|-----------------------------------|----|---|--------|---------|----------------|
| Bilateral consolidation           | 27 | 8 | 11     | 0.5192  | 46             |
| Unilateral consolidation(single)  | 28 | 7 | 19     | 0.8864  | 54             |
| Unilateral consolidation(multipe) | 15 | 3 | 8      | 0.8864  | 26             |
| Pleural effusion                  | 5  | 1 | 1      | 1.0000  | 7              |

M= mycoplasma      V= viral



**Table 3.** Clinical signs in relation to the aetiology of pneumonia, viral aetiology Vs mycoplasma

| findings                               | M (70) | V (18) | P value |
|----------------------------------------|--------|--------|---------|
| Fever >37.5°C                          | 42     | 7      | 0.1078  |
| Increase respiratory rate              | 29     | 14     | 0.0053  |
| CRP(>8)                                | 44     | 9      | 0.2231  |
| WBC(increase)                          | 17     | 6      | 0.4359  |
| Increase lymphocyte percentage         | 10     |        | 0.0184  |
| Increase polymorphonuclears percentage | 19     | 4      | 0.6717  |
| cough                                  | 69     | 16     | 0.1050  |
| wheeze                                 | 3      | 8      | <0.0001 |
| radiograph                             |        |        |         |
| Unilateral consolidation(multipe)      | 15     | 3      | 0.7690  |
| Bilateral consolidation                | 27     | 8      | 0.6498  |
| sex(M)                                 | 29     | 13     | 0.0197  |
| age (>5 years)                         | 32     | 6      | 0.3442  |

M= mycoplasma      V= viral

**Table 4.** Stepwise logistic regression model for significant predictors of viral aetiology of CAP showing lobar or multi foci infiltration

| variable                       | Chi-Square | OR    | 95%Wald<br>Conficence Limits | P value |
|--------------------------------|------------|-------|------------------------------|---------|
| Wheeze                         | 23.0077    | 0.063 | 0.010-0.271                  | <0.0001 |
| Increase lymphocyte percentage | 8.9954     | 0.053 | 0.012-0.337                  | 0.0027  |
| Increase respiratory rate      | 6.7243     | 0.093 | 0.013-0.653                  | 0.0095  |

Hosmer and Lemeshow Goodness-of-Fit Test (p=0.8979)

1  
2  
3  
4  
5  
6  
7  
8  
9  
10  
11  
12  
13  
14  
15  
16  
17  
18  
19  
20  
21  
22  
23  
24  
25  
26  
27  
28  
29  
30  
31  
32  
33  
34  
35  
36  
37  
38  
39  
40  
41  
42  
43  
44  
45  
46  
47  
48  
49  
50  
51  
52  
53  
54  
55  
56  
57  
58  
59  
60

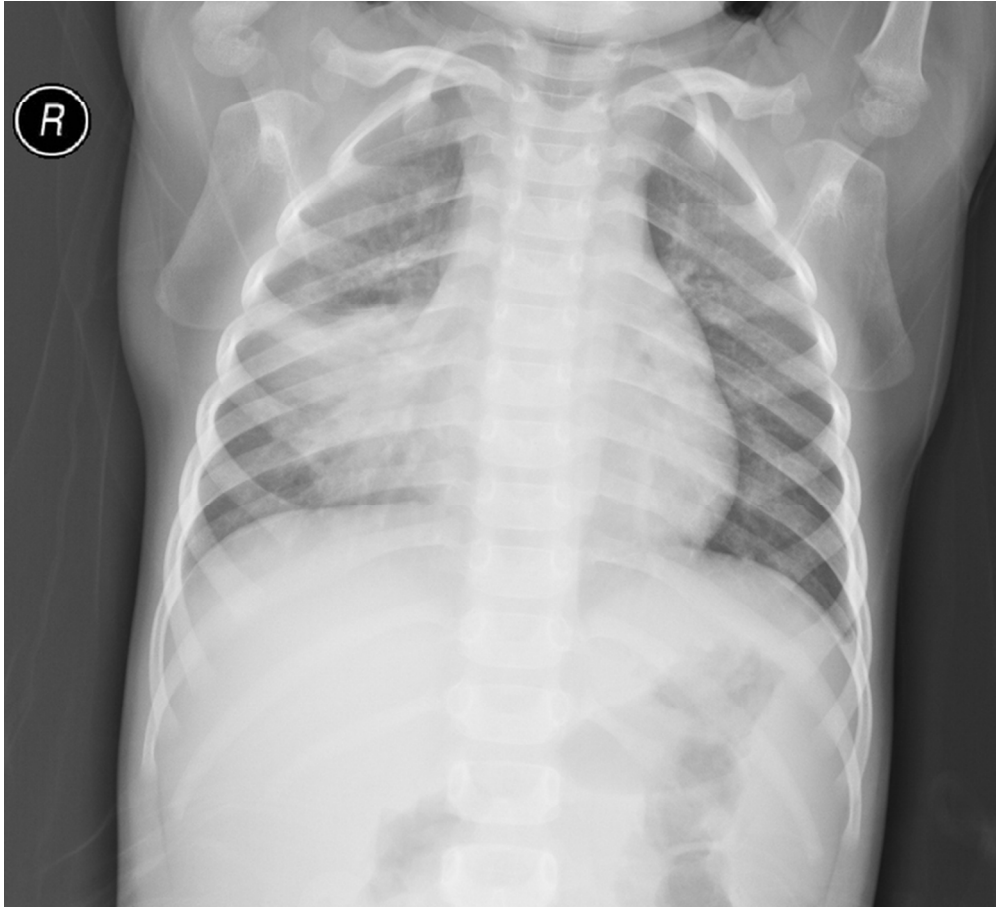

Figure 1. An example of right middle lobe infiltration from a chest radiograph obtained 6 days after the onset of symptoms in a 5-month-old girl with influenza B.  
76x69mm (300 x 300 DPI)

only

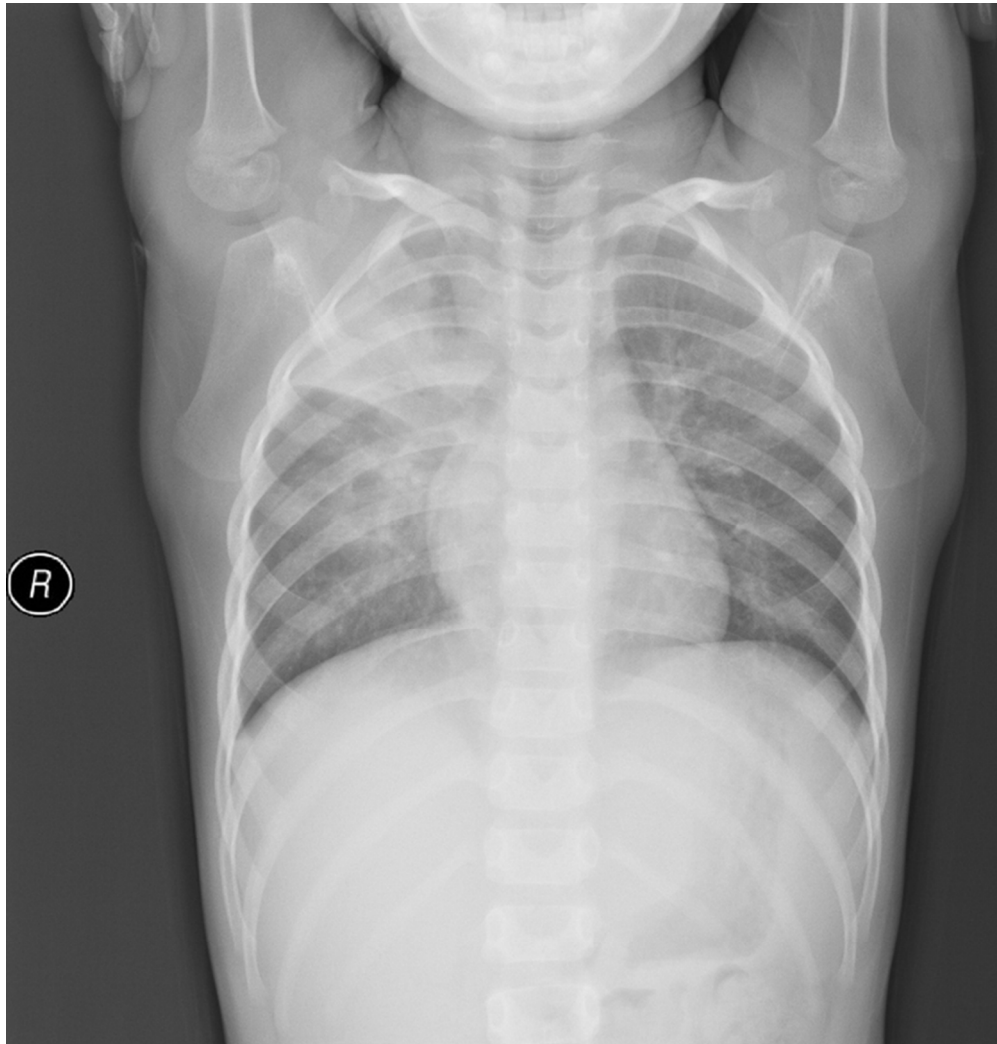

Figure 2. An example of right upper and middle lobe infiltration from a chest radiograph obtained 5 days after the onset of symptoms in a 2-year-old girl with mycoplasma pneumonia. 87x91mm (300 x 300 DPI)

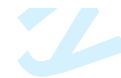

1  
2  
3  
4  
5  
6  
7  
8  
9  
10  
11  
12  
13  
14  
15  
16  
17  
18  
19  
20  
21  
22  
23  
24  
25  
26  
27  
28  
29  
30  
31  
32  
33  
34  
35  
36  
37  
38  
39  
40  
41  
42  
43  
44  
45  
46  
47  
48  
49  
50  
51  
52  
53  
54  
55  
56  
57  
58  
59  
60

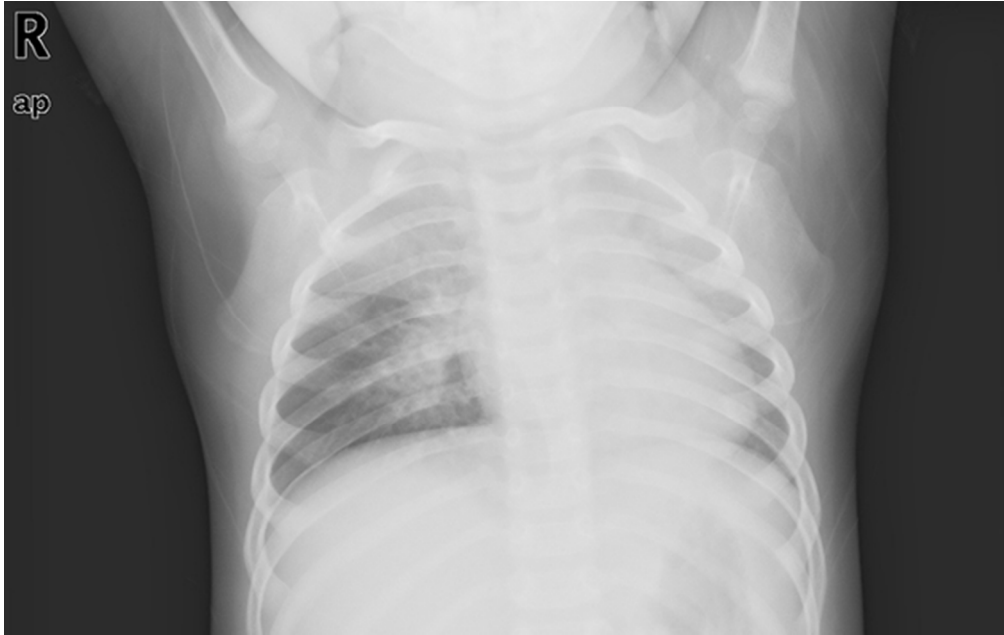

Figure 3. An example of bilateral infiltration in the left upper zone, the right upper zone and middle zone from a chest radiograph taken 4 days after the onset of symptoms in a 16-month-old girl with influenza A. 53x33mm (300 x 300 DPI)

Review only

1  
2  
3  
4  
5  
6  
7  
8  
9  
10  
11  
12  
13  
14  
15  
16  
17  
18  
19  
20  
21  
22  
23  
24  
25  
26  
27  
28  
29  
30  
31  
32  
33  
34  
35  
36  
37  
38  
39  
40  
41  
42  
43  
44  
45  
46  
47  
48  
49  
50  
51  
52  
53  
54  
55  
56  
57  
58  
59  
60

**Institutional Review Board of the children's hospital affiliated to Soochow university.**

We would like to confirm that the article entitled "**Differentiation of Mycoplasma and viral community-acquired pneumonia in children showing lobe or multi foci infiltration**" can be done by Dr. Chuang-li Hao in our hospital. There are no any ethical/legal conflicts involved in the article. Informed consent was enrolled and written by the parents of all children. All experiments were carried out in strict accordance with the institution guidelines regarding the acquisition and experimental use of human tissues. This study was approved by the Institutional Review Board of children's hospital affiliated to Soochow university.

Chairman of the commite Prof Zu-yuan Lu

Signature :

Zu-yuan Lu

2014-7-25

ethical statement  
677x903mm (72 x 72 DPI)

# BMJ Open

## Differentiation between Mycoplasma and viral community-acquired pneumonia in children with lobe or multi foci infiltration: a retrospective case study

|                                 |                                                                                                                                                                                                                                                                                                                                                                                                          |
|---------------------------------|----------------------------------------------------------------------------------------------------------------------------------------------------------------------------------------------------------------------------------------------------------------------------------------------------------------------------------------------------------------------------------------------------------|
| Journal:                        | <i>BMJ Open</i>                                                                                                                                                                                                                                                                                                                                                                                          |
| Manuscript ID:                  | bmjopen-2014-006766.R1                                                                                                                                                                                                                                                                                                                                                                                   |
| Article Type:                   | Research                                                                                                                                                                                                                                                                                                                                                                                                 |
| Date Submitted by the Author:   | 24-Nov-2014                                                                                                                                                                                                                                                                                                                                                                                              |
| Complete List of Authors:       | Guo, Wan-liang; the Children's Hospital Affiliated to Soochow University, Radiology department<br>Wang, Jian; the Children's Hospital Affiliated to Soochow University, General surgery department<br>Zhu, Li-yuan; the Children's Hospital Affiliated to Soochow University, Respiratory department<br>Hao, Chuang-li; the Children's Hospital Affiliated to Soochow University, Respiratory department |
| <b>Primary Subject Heading</b>: | Paediatrics                                                                                                                                                                                                                                                                                                                                                                                              |
| Secondary Subject Heading:      | Infectious diseases, Paediatrics, Radiology and imaging                                                                                                                                                                                                                                                                                                                                                  |
| Keywords:                       | Paediatric radiology < PAEDIATRICS, Paediatric thoracic medicine < PAEDIATRICS, Paediatric infectious disease & immunisation < PAEDIATRICS                                                                                                                                                                                                                                                               |
|                                 |                                                                                                                                                                                                                                                                                                                                                                                                          |

SCHOLARONE™  
Manuscripts

only

1  
2  
3  
4 **Differentiation between Mycoplasma and viral community-acquired pneumonia**

5  
6 **in children with lobe or multi foci infiltration: a retrospective case study**

7  
8 **Wan-liang Guo\*<sup>a</sup>, Jian Wang\*<sup>b</sup>, Li-yuan Zhu<sup>c</sup>, Chuang-li Hao\*\*<sup>c</sup>**

9  
10 **<sup>a</sup> Radiology department, the Children's Hospital Affiliated to Soochow University,**  
11 **Suzhou , China, 215003**

12  
13 **<sup>b</sup> General surgery department, the Children's Hospital Affiliated to Soochow**  
14 **University, Suzhou , China.215003, China, 215003**

15  
16 **<sup>c</sup> Respiratory department, the Children's Hospital Affiliated to Soochow**  
17 **University, Suzhou , China, 215003**

18  
19 \* Wan-liang Guo and Jian Wang contributed equally to this work.

20  
21 \*\*Correspondence authors: Chuang-li Hao, Phone:+8615950011521,

22  
23 Fax:+8651265224492, E-mail:clhaosuzhou@163.com

24  
25  
26  
27  
28  
29  
30  
31 **Objectives:** The aim of this paper seeks to analyze the clinical features, inflammatory  
32 markers, and radiographs of community-acquired pneumonia (CAP) cases with lobe  
33 or multi foci infiltration; with a special focus on factors which allow the differential  
34 diagnosis of *viral* and *mycoplasma pneumonia*.  
35  
36  
37  
38  
39

40  
41 **Setting :**This is a retrospective chart review of CAP cases in a large University  
42 teaching hospital..  
43  
44

45  
46 **Participants:** 126 pediatric CAP cases, with lobe or multi foci infiltration, presenting  
47 between May 2012 and April 2013. Demographic data, clinical presentation upon  
48 admission or referral, laboratory tests, prior history, and radiography were collected  
49 for each case if available.  
50  
51  
52  
53  
54

55  
56 **Primary and secondary outcome measures:** We used univariate and multivariate  
57  
58  
59  
60

1  
2  
3  
4 logistic regression to determine the significant factors which allow the differential  
5  
6 diagnosis of *viral* and *mycoplasma* CAP with lobe or multi foci infiltration.  
7

8  
9 **Results:** Overall, there were 71 (56%) male and 55 (44%) female CAP cases with  
10  
11 lobar or multi foci infiltration. Seventy pneumonia cases were caused by *mycoplasma*  
12  
13 *pneumoniae* and eighteen by viruses. Univariate analysis of the *mycoplasma* and *viral*  
14  
15 causes of the CAP revealed that increased respiratory rate, wheeze, male gender, and  
16  
17 lymphocyte percentage were the factors associated with the differentiation of  
18  
19  
20  
21 *mycoplasma* and *viral* etiologies of pneumonia ( $P < 0.05$ ). A stepwise logistic  
22  
23 regression analysis was performed to assess independent factors which allow the  
24  
25 differential diagnosis of *viral* and *mycoplasma pneumoniae*. Increased respiratory rate,  
26  
27 wheeze, and lymphocyte percentage were reliable independent factors which allow  
28  
29 the differential diagnosis of *viral* and *mycoplasma* CAP with lobar or multi foci  
30  
31 infiltration.  
32  
33  
34

35  
36 **Conclusions:** Whether the CAP with lobar or multi foci infiltration was caused by  
37  
38 *mycoplasma* species or *viruses* could not be inferred from the radiological patterns.  
39  
40 Wheeze, lymphocyte percentage, and respiratory rate were independent factors which  
41  
42 allowed the differential diagnosis of *viral* and *mycoplasma* CAP with lobar or multi  
43  
44 foci infiltration.  
45  
46  
47

48  
49  
50  
51 **Keywords:** Community-acquired pneumonia; Children; lobar; multi foci; etiology  
52  
53  
54

55  
56  
57 **Strengths and limitations of this study**  
58  
59  
60



1  
2  
3  
4 Over a period of 1 year, a retrospective study was carried out in our hospital. A  
5  
6 stepwise logistic regression analysis of 88 cases was performed to assess independent  
7  
8 predictors which allowed the differential diagnosis of *viral* and *mycoplasma* caused  
9  
10 CAP. Increased respiratory rate, wheeze and lymphocyte percentage were  
11  
12 significantly predictive regarding the differentiation between *viral* and *mycoplasma*  
13  
14 caused CAP with lobar or multi foci infiltration, as was *viral* aetiology of CAP with  
15  
16 lobar or multi foci infiltration, increase respiratory rate, wheeze and increase  
17  
18 lymphocyte percentage.  
19  
20  
21  
22

23  
24 This study has several limitations. Firstly, it was a retrospective study, and  
25  
26 therefore there may have been some selection bias. Secondly, *viral* pneumonia could  
27  
28 be missed due to the sensitivity of immunofluorescence and the limit number of virus  
29  
30 we detected. Thirdly, there may be some cases in which the patient had a *viral* as well  
31  
32 as bacterial or a combined *bacterial* and *mycoplasma* infection which cannot be  
33  
34 detected. Therefore, prospective further, preferably prospective studies on CAP with  
35  
36 lobar or multi foci infiltration are needed.  
37  
38  
39  
40  
41  
42

### 43 44 **Introduction**

45  
46 For the pediatric population, community-acquired pneumonia (CAP) is among the  
47  
48 most frequent causes of hospital admission. CAP remains a major cause of morbidity  
49  
50 and mortality worldwide, especially regarding children less than 5 years of age. Most  
51  
52 children with CAP live in the developing countries [1]. *Viruses* and *mycoplasma*  
53  
54 species are two main of the many pathogenic agents which can cause CAP [2, 3, 4].  
55  
56  
57  
58  
59  
60

1  
2  
3  
4 The symptoms of Community-acquired pneumonia are varying considerably  
5  
6 depending on their aetiology, its infection pattern, and the underlying medical  
7  
8 conditions. In clinical practice, most of the CAP diagnoses are based on radiography  
9  
10 and clinical symptoms. There are some report cases in which the etiologies of CAPs  
11  
12 were established on the bases clinical signs, radiological findings, or non-specific  
13  
14 inflammatory serum markers [5, 6, 7]. In radiography, most of CAP cases are  
15  
16 indicated by patchy areas of lung consolidation distributed along the lung markings,  
17  
18 and diagnosed as bronchopneumonia. However, lobe or multi foci infiltration is the  
19  
20 other two important kinds of CAP in clinical.  
21  
22  
23  
24

25  
26 Both *viruses* as well as *mycoplasma* species can lead to lobe or multi foci  
27  
28 infiltration in CAP. The therapy strategy for CAP cases is as controversial as it is  
29  
30 crucial. The use of antibiotics before the etiology is found out is debated. On the other  
31  
32 hand, to establish the cause of CAP cases needs time. Hence, tests must be devised  
33  
34 which allow an early differentiation between *viral* and *mycoplasma pneumonia*.  
35  
36 Unfortunately, studies focusing on CAP with lobe or multi foci infiltration are yet to  
37  
38 be carried out.  
39  
40  
41  
42

43  
44 Therefore, from May, 2012 to May, 2013, over a period of 1 year, a retrospective  
45  
46 study was carried out in our hospital to examine the clinical features, inflammatory  
47  
48 markers (C-Reactive Protein, white blood cell counting, and lymphocyte percentage),  
49  
50 and radiographs of CAP cases with lobe or multi foci infiltration; with a special focus  
51  
52 on factors which would allow the differential diagnosis of *viral* and *mycoplasma*  
53  
54  
55  
56  
57  
58  
59  
60  
*pneumonia*.

## Materials and Methods

### *Study Subjects*

This study was approved by the Institutional Review Board of the Children's Hospital Affiliated to Soochow University. Informed consent was enrolled and written by the parents of all children. During a surveillance period of 12 months (from May, 2012 to April, 2013), 126 consecutive, previously healthy children with radiologically confirmed lobar or multi foci infiltration of the lung were treated at our Hospital.

One hundred twenty six CAP patients were analyzed for gender, fever, wheeze, increase of respiratory rate, cough, CRP, and radiological findings among three different age groups namely 0-23 months, 2-4 years, and older than 5 years. Then, incidence of proven *viral* and *mycoplasma* CAP was investigated. Of these 88 proven CAP patients, fever, increase of respiratory rate, CRP, WBC, cough, wheeze, and radiological findings were statistically analyzed.

The respiratory rates of the 126 patients were measured: they were age-related; The respiratory rate was less than 45 per minute in children younger than 28 days old, less than 40 per minute in children between 29 days and 1 year old, less than 30 per minute in children between 1 and 3 years old, less than 25 per minute in children between 4 and 7 years old, and less than 20 per minute in children older than 8 years.

Nasopharyngeal swab specimens were routinely collected within 24 hours of admission, and bronchial-aspirate samples were obtained after tracheal intubation. Respiratory specimens were tested for *influenza A* and *B*, *adenovirus*, *respiratory syncytial virus (RSV)*, *bokavirus*, *human metapneumovirus (hMPV)*,

1  
2  
3  
4 and *parainfluenza virus*( *PIFV*) 1, 2, and 3; using direct immunofluorescence assays.

5  
6 *Viral pneumonia* was defined as acute respiratory disease with abnormal chest  
7  
8 radiograph findings and positive laboratory tests for one of the aforementioned *viruses*.  
9

10  
11 In addition, blood specimens were obtained within 24 hours of admission for *bacterial*  
12  
13 cultures. Other blood tests, including for C-reactive protein (CRP), white blood cells,  
14  
15 and lymphocyte percentages and neutrophil percentages, were also performed.  
16  
17

18  
19 The diagnosis of *mycoplasma pneumonia* was based on the results from real-time  
20  
21 PCR targeting the P1 cytoadhesion type 1 and 2 genes of the *mycoplasma pneumoniae*  
22  
23 genome, using DNA extracted from nasopharyngeal-swab specimens. *Mycoplasma*  
24  
25 *pneumonia* was defined as acute respiratory disease with abnormal chest radiograph  
26  
27 findings and positive laboratory tests combined by real-time PCR. Patients with  
28  
29 simultaneous *viral* and *mycoplasma* infections were excluded from this study.  
30  
31  
32

### 33 34 ***Radiography***

35  
36 The symptoms typically occurred at 4-7 days before the chest radiographs, via an  
37  
38 anteroposterior projection with the child lying. Images was independently reviewed  
39  
40 by two radiologist, when there has different opinion, they reached a diagnostic  
41  
42 conclusion by consensus. Chest radiograph findings were classified as lobar or multi  
43  
44 foci infiltration (unilateral or bilateral). The distribution of abnormalities was  
45  
46 categorized as lobar, multi foci. A lobar distribution was defined as a single lobar of  
47  
48 abnormality. If there were two or more foci(unilateral or bilateral), the distribution of  
49  
50 abnormality was considered multi foci[3].  
51  
52  
53  
54  
55

### 56 57 ***Statistical Analysis***

1  
2  
3 Data are presented as number (*n*) and percentage. Univariate comparisons were  
4 made using nonparametric one-way Wilcoxon rank sum, chi-squared ( $\chi^2$ ), or Fisher's  
5 exact tests; depending on the statistical distribution. To evaluate the ability to  
6 differentiate between *mycoplasma* and *viral* CAP cases with lobar or multi foci  
7 infiltration, a stepwise logistic regression analysis was performed with the statistical  
8 analysis software (SAS) 8. Probability values of P less than 0.05 were considered  
9 statistically significant.  
10  
11  
12  
13  
14  
15  
16  
17  
18  
19

## 20 21 **Results**

22 Overall, there were 71 (56%) male and 55 (44%) female CAP cases with lobar or  
23 multi foci infiltration. The median age of the 126 patients was 4 years (range, 11 days  
24 to 14 years). The presenting signs and symptoms were fever (47.6%), wheeze  
25 (14.3%)(without history of asthma ), increase of respiratory rate (55.6%) and cough  
26 (97.6%). Fever and increase of respiratory rate are more common in the "over 5-year"  
27 group; however, wheeze is more common in "under 23-month" group (see Table 1).  
28  
29  
30  
31  
32  
33  
34  
35  
36  
37  
38

39 Findings in chest radiograph included lobar infiltration (see Figure 1) in 54 patients,  
40 multi foci infiltration including unilateral infiltration(see Figure 2) in 26 patients, and  
41 bilateral infiltration(see Figure 3) in 46 patients. Seven patients had pleural effusions.  
42  
43 An analysis of the correlation between aetiology and radiography findings showed  
44 that there were no significant differences between them ( $P>0.05$ ) (Table 2).  
45  
46  
47  
48  
49  
50

51 Seventy of the CAP cases were caused by *mycoplasma* species and 18 by *viruses*,  
52 including *influenza A* (n=2), *influenza B* (n=1), *adenovirus* (n=2), *RSV* (n=9),  
53 *bokavirus* (n=2), and *PIFV 3* (n=2). Univariate analysis revealed that the factors  
54  
55  
56  
57  
58  
59  
60

1  
2  
3  
4 which allowed the differential diagnosis of *viral* and *mycoplasma* CAP were increased  
5  
6 respiratory rate, wheeze, male, and lymphocyte percentage ( $P<0.05$ ). There were no  
7  
8 significant differences in age, radiological findings, fever, cough, CRP, and WBC  
9  
10 ( $P>0.05$ ) (see Table 3).

11  
12  
13 A stepwise logistic regression analysis of 88 cases was performed to assess  
14  
15 independent predictors which allowed the differential diagnosis of *viral* and  
16  
17 *mycoplasma* caused CAP. Increased respiratory rate, wheeze and lymphocyte  
18  
19 percentage were significantly predictive regarding the differentiation between *viral*  
20  
21 and *mycoplasma* caused CAP with lobar or multi foci infiltration (see Table 4), as was  
22  
23 *viral* aetiology of CAP with lobar or multi foci infiltration, increase respiratory rate,  
24  
25 wheeze and increase lymphocyte percentage. The logistic regression model was  
26  
27 consistent with the findings reported by Hosmer and Lemeshow who used the  
28  
29 goodness-of-fit test ( $P=0.8979$ ).  
30  
31  
32  
33  
34  
35  
36  
37  
38

### 39 Discussion

40  
41 In this study, 126 CAP cases with lobar or multi foci infiltration were observed  
42  
43 over a period of 1 year. About 69.8% of the CAP cases were caused by *mycoplasma*  
44  
45 species or *virus*. The etiology of 38 cases could not be detected, partly because the  
46  
47 positive of *bacterial* pathogens in blood culture is very low. Our results are very  
48  
49 similar to those of Zhang et al. who reported 707 severe CAP cases; blood cultures  
50  
51 were positive in only 5, i.e., 0.7% [2]. This means that new methods with higher  
52  
53 sensitivities for *bacterial* pathogens in blood must be devised which can be routinely  
54  
55  
56  
57  
58  
59  
60

1  
2  
3  
4 used in all laboratories (which is currently not the case) [8]. On the other hand, 55.6%  
5  
6 of our patients had tachypnoea and 47.6% had fever, and these symptoms were more  
7  
8 common in the “over 5-year” group. The CRP is higher in the “over 5-year” group  
9  
10 than in the other two groups; maybe more infiltration foci can be found in the over  
11  
12 5-year” group. Our results are similar to two other studies [9,10]. However wheeze is  
13  
14 more common in the “below 23-month” group; this finding is different from that of a  
15  
16 recent study [11], partly because the sample we focus on pneumoniae with lobar or  
17  
18 multi foci infiltration.  
19  
20  
21  
22  
23

24 In clinical practice, the radiographic detection of infiltrations is currently the gold  
25  
26 standard for the diagnosis of CAP. Most CAP cases are diagnosed as bronchial  
27  
28 pneumonia in radiograph. However, lobe or multi foci infiltrations are the other two  
29  
30 radiological manifestations of CAP [3,11]. Some authors reported that in clinical  
31  
32 practice lobar infiltrations are often caused by *bacteria* [6]. However, in this study,  
33  
34 69.8% of the CAP case was caused by *viruses* and *mycoplasma* species: especially,  
35  
36 *mycoplasma* associated with etiological findings, it account 55.6% in this group. This  
37  
38 finding is consistent with some previous studies [3,12]. In our study, there were 41  
39  
40 CAP cases with *bilateral* infiltrations and 61 CAP cases with multi foci. When  
41  
42 analysis on distribution and the number of focus. There is no significant difference  
43  
44 associating with etiological findings. Even some of cases with pleural effusion, there  
45  
46 is no significant difference associating with etiological findings. This means that  
47  
48 whether the CAP with lobar or multi foci infiltration was caused by *mycoplasma*  
49  
50 species or *viruses* could not be inferred from the radiological patterns. In a recent  
51  
52  
53  
54  
55  
56  
57  
58  
59  
60

1  
2  
3  
4 study about pediatric CAP, Korppi et al. analyzed the clinical or radiological  
5  
6 characteristics of 101 CAP cases, and they concluded that radiographs are not helpful  
7  
8 when it comes to differentiating between *viral*, *pneumococcal*, and *atypical bacterial*  
9  
10 aetiology of CAP in children [11]. This conclusion coincides with our results:  
11  
12  
13 Radiological pattern did not allow a reliable differentiation between *mycoplasma* and  
14  
15 *viral* CAP.  
16  
17

18  
19 To investigate potential factors that may allow differentiating between *viral* and  
20  
21 *mycoplasma* CAP is very important for clinical practice. In this study, our aim was to  
22  
23 describe the utility of some laboratory markers and clinical features regarding the  
24  
25 differentiation between *mycoplasma* and *viral* CAP with lobar or multi foci  
26  
27 infiltrations. Univariate analysis showed that findings such wheeze, lymphocyte  
28  
29 percentage, respiratory rate, and sex can help to differentiate between *mycoplasma*  
30  
31 and *viral* CAP with lobar or multi foci infiltration. Furthermore, multiple logistic  
32  
33 regression showed that wheeze, increase of lymphocyte percentage, and increase of  
34  
35 respiratory rate are independent factors which allow to differentiate between  
36  
37 *mycoplasma* and *viral* CAP with lobar or multi focus infiltration. This means that  
38  
39 among *mycoplasma* and *viral* CAP with lobar or multi foci infiltration, wheeze,  
40  
41 increase of lymphocyte percentage, and increase of respiratory rate can help to  
42  
43 diagnose *viral pneumonia*.  
44  
45  
46  
47  
48  
49

50  
51 Hatipoğlu et al. [13] reported 147 viral CAP cases, and they found that the  
52  
53 prominent symptoms of the patients were cough (88.9%) and wheeze (72.2%). This is  
54  
55 similar to our results. In another report [11], 101 CAP cases were analyzed. Although  
56  
57  
58  
59  
60



1  
2  
3  
4 the report lacked data on respiratory rate in 20 cases, it included supplementary  
5  
6 sensitivity analyses by adding the cases with missing data as non-tachypnoea cases in  
7  
8 the analyses. Moreover, the report concluded that tachypnoea is not associated with  
9  
10 the aetiology of CAP. The above study is different from our findings. The reason may  
11  
12 be that we used multiple factor analysis and selected mycoplasma and viral CAP with  
13  
14 lobar or multi foci infiltration as our object of study. We believe that our will have a  
15  
16 significant impact on the efforts to find new treatment strategies for this type of CAP.  
17  
18  
19

20  
21 Youn et al. [9] reported 95 *mycoplasma pneumoniae* cases with segmental or lobar  
22  
23 infiltrations. They found that the lymphocyte percentage was at a normal level.  
24

25  
26 Defilippi et al. [10] reported 102 CAP cases with a positive PCR for *mycoplasma*  
27  
28 *pneumoniae*: they found that the lymphocyte percentage (median) is at normal level, a  
29  
30 result similar to ours. Hatipoğlu et al. [13] reported 147 cases with pneumonia, the  
31  
32 percentage of polymorphonuclear leukocytes the *viral pneumonia* cases was lower  
33  
34 than patients *virus* not isolated, it suggests that Lymphocyte percentage may be higher  
35  
36 in pneumonian in acute phase of pneumonia. The above-mentioned literature suggests  
37  
38 that *viral pneumonia* often presents a higher percentage of lymphocyte. This  
39  
40 conclusion is similar to our results.  
41  
42  
43  
44  
45

46  
47 This study has several limitations. Firstly, it was a retrospective study, and  
48  
49 therefore there may have been some selection bias. Secondly, *viral pneumonia* could  
50  
51 be missed due to the sensitivity of immunofluorescence and the limit number of *virus*  
52  
53 we detected. Thirdly, there may be some cases in which the patient had a viral as well  
54  
55 as *bacterial* or a combined *bacterial* and *mycoplasma* infection which cannot be  
56  
57  
58  
59  
60

1  
2  
3  
4 detected. Therefore, prospective further, preferably prospective studies on CAP with  
5  
6 lobar or multi foci infiltration are needed.  
7

8  
9 In conclusion, more than half of the CAP cases with lobar or multi foci infiltration  
10  
11 are caused by *mycoplasma* species or *viruses*. Whether the CAP with lobar or multi  
12  
13 foci infiltration was caused by *mycoplasma* species or *viruses* could not be inferred  
14  
15 from the radiological patterns. We found that wheeze, lymphocyte percentage, and  
16  
17 respiratory rates were independent factors which allow the differential diagnosis of  
18  
19 *viral* and *mycoplasma* caused CAP with lobar or multi foci infiltration, as was *viral*  
20  
21 aetiology of CAP with lobar or multi foci infiltration, increase respiratory rate,  
22  
23 wheeze and increase lymphocyte percentage.  
24  
25  
26  
27  
28  
29  
30

### 31 **Contributorship**

32 study design and paper writing: Chuang-li Hao

33  
34 data collection and paper writing: Wan-liang Guo, Jian Wang

35  
36 data collection and data analysis: li-yuan Zhu  
37  
38

39  
40 All authors have read and approved the content, and agree to submit for  
41  
42 consideration for publication in this journal. There is no any legal conflicts  
43  
44 involved in the article.  
45  
46  
47

### 48 **Data sharing**

49  
50 No additional data available  
51  
52

### 53 **Competing Interests**

54  
55  
56 None  
57  
58  
59  
60

**Reference:**

- [1] Rudan I, Boschi-Pinto C, Biloglav Z, et al. Epidemiology and etiology of childhood pneumonia. *Bull World Health Organ* 2008;86(5):408-16.
- [2] Zhang Q1, Guo Z, Bai Z, et al. A 4 year prospective study to determine risk factors for severe community acquired pneumonia in children in southern China. *Pediatr Pulmonol* 2013;48(4):390-7.
- [3] Guo W, Wang J, Sheng M, et al. Radiological findings in 210 paediatric patients with viral pneumonia: a retrospective case study. *Br J Radiol* 2012;85(1018):1385-9.
- [4] Cardinale F1, Cappiello AR, Mastrototaro MF, et al. Community-acquired pneumonia in children. *Early Hum Dev* 2013;89 Suppl 3:S49-52.
- [5] Don M, Valent F, Korppi M, et al. Differentiation of bacterial and viral community-acquired pneumonia in children. *Pediatr Int* 2009;51(1):91-6.
- [6] Virkki R, Juven T, Rikalainen H, et al. Differentiation of bacterial and viral pneumonia in children. *Thorax* 2002;57(5):438-41.
- [7] Korppi M. Non-specific host response markers in the differentiation between pneumococcal and viral pneumonia: what is the most accurate combination? *Pediatr Int* 2004;46(5):545-50.
- [8] Esposito S, Marchese A, Tozzi AE, et al. Bacteremic pneumococcal community-acquired pneumonia in children less than 5 years of age in Italy. *Pediatr Infect Dis J* 2012;31(7):705-10.

1  
2  
3  
4 [9] Youn YS, Lee KY, Hwang JY, et al. Difference of clinical features in childhood  
5  
6 Mycoplasma pneumoniae pneumonia. BMC Pediatr 6;10:48.  
7

8  
9 [10] Defilippi A, Silvestri M, Tacchella A, et al. Epidemiology and clinical features  
10  
11 of Mycoplasma pneumoniae infection in children. Respir Med 2008; 102(12):1762-8.  
12

13  
14 [11] Korppi M, Don M, Valent F, et al. The value of clinical features in  
15  
16 differentiating between viral, pneumococcal and atypical bacterial pneumonia in  
17  
18 children. Acta Paediatr 2008;97(7):943-7.  
19

20  
21 [12] Lee I, Kim TS, Yoon HK. Mycoplasma pneumoniae pneumonia: CT features  
22  
23 in 16 patients. Eur Radiol 2006; 16(3):719-25.  
24

25  
26 [13] Hatipoğlu N1, Somer A, Badur S, et al. Ünüvar E. Viral etiology in hospitalized  
27  
28 children with acute lower respiratory tract infection. Turk J Pediatr  
29  
30 2011;53(5):508-16.  
31

### 32 33 **Figure Legends**

34  
35  
36 Figure 1. An example of right middle lobe infiltration from a chest radiograph  
37  
38 obtained 6 days after the onset of symptoms in a 5-month-old girl with influenza B.  
39

40  
41 Figure 2. An example of right upper and middle lobe infiltration from a chest  
42  
43 radiograph obtained 5 days after the onset of symptoms in a 2-year-old girl with  
44  
45 mycoplasma pneumonia.  
46  
47

48  
49 Figure 3. An example of bilateral infiltration in the left upper zone, the right upper  
50  
51 zone and middle zone from a chest radiograph taken 4 days after the onset of  
52  
53 symptoms in a 16-month-old girl with influenza A.  
54  
55

**Table 1.** Clinical signs and symptoms in 126 children with CAP, in relation to the age

| symptoms                              | 0–23<br>months(n=34) | 2–4<br>years(n=39) | ≥5 years<br>(n=53) | P value | Total(n=126) |
|---------------------------------------|----------------------|--------------------|--------------------|---------|--------------|
| fever >37,5°C                         | 7                    | 22                 | 31                 | 0.0011  | 60           |
| wheeze                                | 13                   | 2                  | 3                  | <0.0001 | 18           |
| increase respiratory rate             | 12                   | 17                 | 41                 | 0.0001  | 70           |
| cough                                 | 32                   | 38                 | 53                 | 0.2131  | 123          |
| CRP(>8)                               | 10                   | 27                 | 39                 | <0.0001 | 76           |
| lobar infiltration                    | 11                   | 18                 | 25                 | 0.9524  | 54           |
| unilateral infiltration<br>(multiple) | 5                    | 8                  | 13                 | 0.9524  | 26           |
| bilateral infiltration                | 18                   | 13                 | 15                 | 0.0587  | 46           |
| pleural effusion                      | 1                    | 2                  | 4                  | 0.8847  | 7            |
| sex(M)                                | 24                   | 16                 | 31                 | 0.0364  | 71           |

**Table 2.** Radiological findings in children with large consolidation of CAP

| radiological findings              | M  | V | unknown | P-value | Total patients |
|------------------------------------|----|---|---------|---------|----------------|
| lobar infiltration                 | 28 | 7 | 19      | 0.8864  | 54             |
| unilateral infiltration (multiple) | 15 | 3 | 8       | 0.8864  | 26             |
| bilateral infiltration             | 27 | 8 | 11      | 0.5192  | 46             |
| pleural effusion                   | 5  | 1 | 1       | 1.0000  | 7              |

M= mycoplasma      V= viral

**Table 3.** Clinical signs in relation to the aetiology of pneumonia, viral aetiology Vs mycoplasma

| findings                               | M (n=70) | V (n=18) | P value |
|----------------------------------------|----------|----------|---------|
| fever >37.5°C                          | 42       | 7        | 0.1078  |
| wheeze                                 | 3        | 8        | <0.0001 |
| increase respiratory rate              | 29       | 14       | 0.0053  |
| cough                                  | 69       | 16       | 0.1050  |
| CRP(>8)                                | 44       | 9        | 0.2231  |
| WBC(increase)                          | 17       | 6        | 0.4359  |
| increase lymphocyte percentage         | 10       | 7        | 0.0184  |
| increase polymorphonuclears percentage | 19       | 4        | 0.6717  |
| radiograph                             |          |          |         |
| multi foci infiltration (unilateral)   | 15       | 3        | 0.7690  |
| multi foci infiltration (bilateral)    | 27       | 8        | 0.6498  |
| sex(M)                                 | 29       | 13       | 0.0197  |
| age (>5 years)                         | 32       | 6        | 0.3442  |

M= mycoplasma      V= viral

**Table 4.** Stepwise logistic regression model for significant predictors of viral aetiology of CAP showing lobar or multi foci infiltration

| variable                          | Chi-Square | OR    | 95%Wald<br>Confidence Limits | P value |
|-----------------------------------|------------|-------|------------------------------|---------|
| wheeze                            | 23.0077    | 0.063 | 0.010-0.271                  | <0.0001 |
| increase respiratory rate         | 6.7243     | 0.093 | 0.013-0.653                  | 0.0095  |
| increase lymphocyte<br>percentage | 8.9954     | 0.053 | 0.012-0.337                  | 0.0027  |

Hosmer and Lemeshow Goodness-of-Fit Test (p=0.8979)

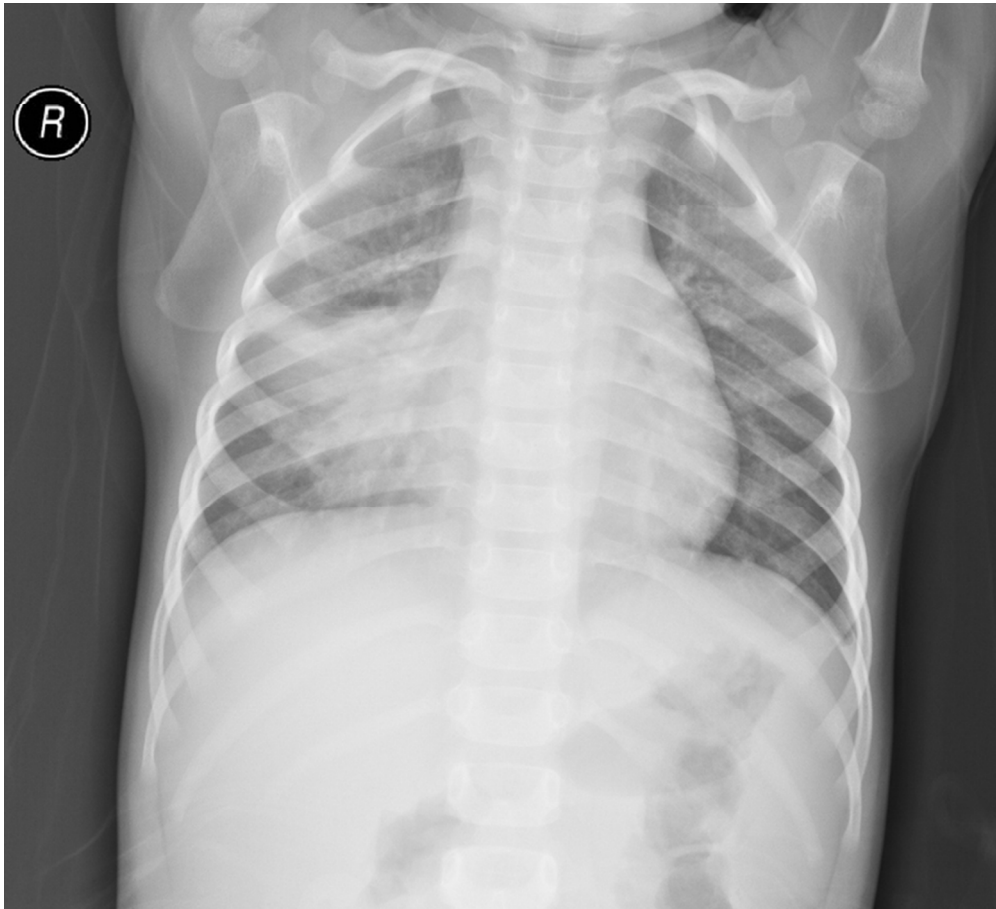

Figure 1. An example of right middle lobe infiltration from a chest radiograph obtained 6 days after the onset of symptoms in a 5-month-old girl with influenza B.  
76x69mm (300 x 300 DPI)

only



1  
2  
3  
4  
5  
6  
7  
8  
9  
10  
11  
12  
13  
14  
15  
16  
17  
18  
19  
20  
21  
22  
23  
24  
25  
26  
27  
28  
29  
30  
31  
32  
33  
34  
35  
36  
37  
38  
39  
40  
41  
42  
43  
44  
45  
46  
47  
48  
49  
50  
51  
52  
53  
54  
55  
56  
57  
58  
59  
60

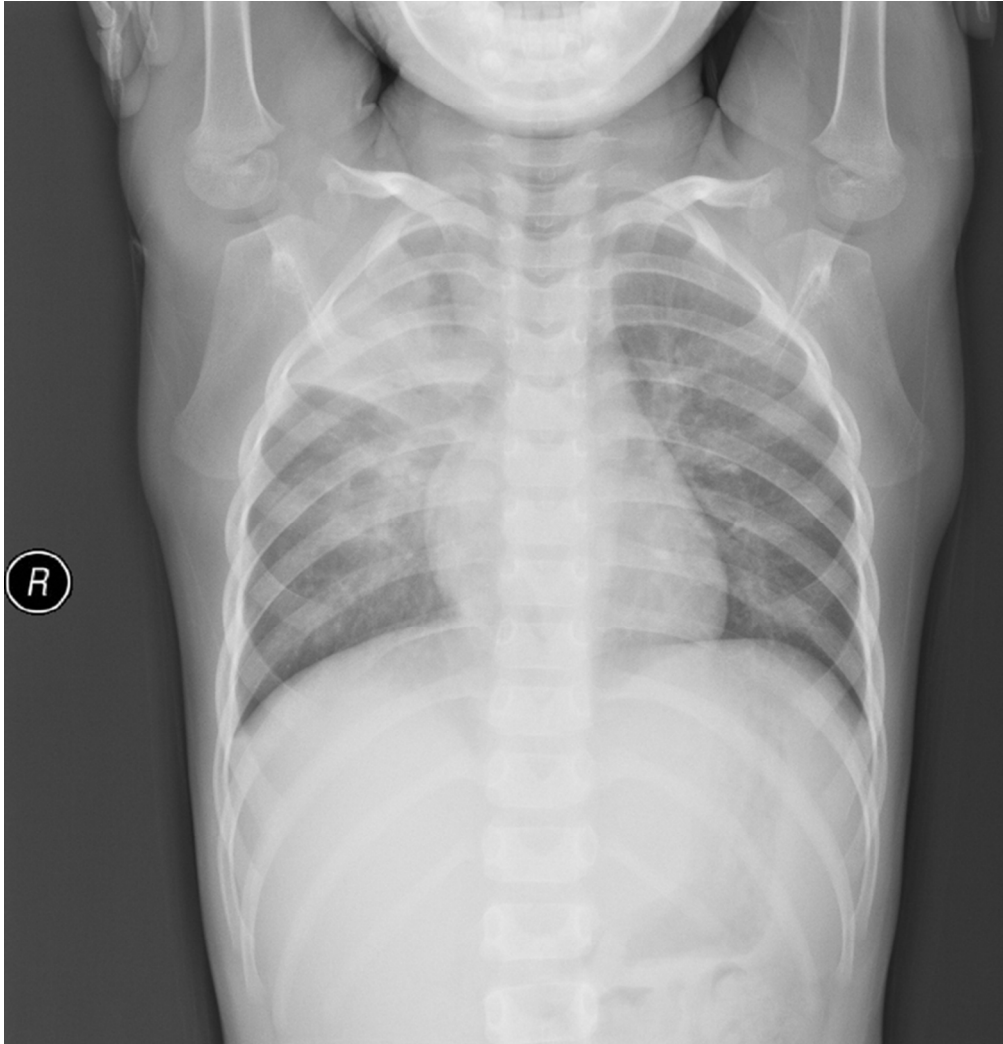

Figure 2. An example of right upper and middle lobe infiltration from a chest radiograph obtained 5 days after the onset of symptoms in a 2-year-old girl with mycoplasma pneumonia. 87x91mm (300 x 300 DPI)

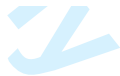

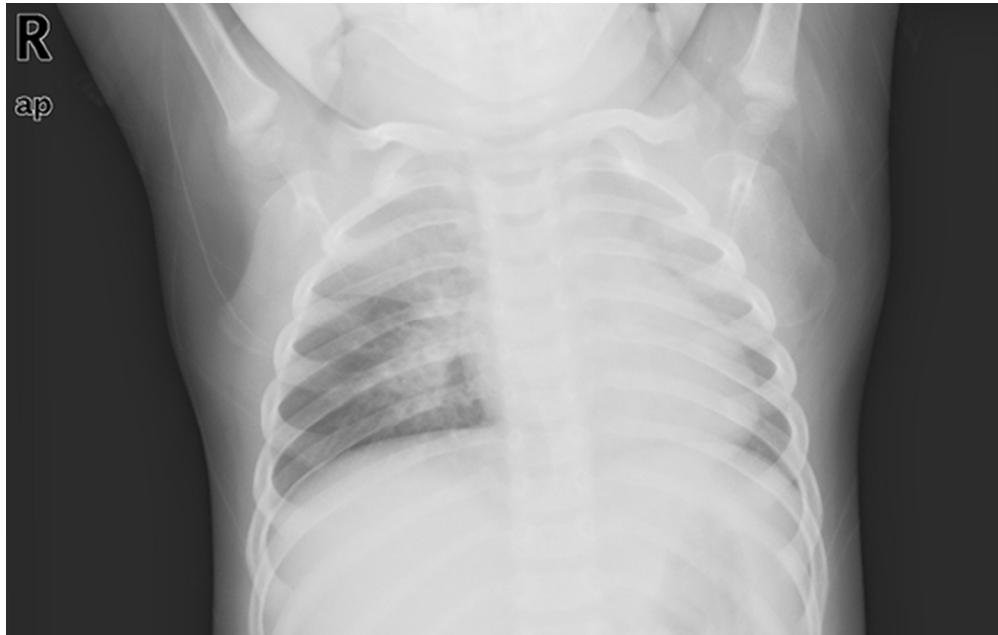

Figure 3. An example of bilateral infiltration in the left upper zone, the right upper zone and middle zone from a chest radiograph taken 4 days after the onset of symptoms in a 16-month-old girl with influenza A. 53x33mm (300 x 300 DPI)

# BMJ Open

## Differentiation between mycoplasma and viral community-acquired pneumonia in children with lobe or multi foci infiltration: a retrospective case study

|                                 |                                                                                                                                                                                                                                                                                                                                                                                                          |
|---------------------------------|----------------------------------------------------------------------------------------------------------------------------------------------------------------------------------------------------------------------------------------------------------------------------------------------------------------------------------------------------------------------------------------------------------|
| Journal:                        | <i>BMJ Open</i>                                                                                                                                                                                                                                                                                                                                                                                          |
| Manuscript ID:                  | bmjopen-2014-006766.R2                                                                                                                                                                                                                                                                                                                                                                                   |
| Article Type:                   | Research                                                                                                                                                                                                                                                                                                                                                                                                 |
| Date Submitted by the Author:   | 23-Dec-2014                                                                                                                                                                                                                                                                                                                                                                                              |
| Complete List of Authors:       | Guo, Wan-liang; the Children's Hospital Affiliated to Soochow University, Radiology department<br>Wang, Jian; the Children's Hospital Affiliated to Soochow University, General surgery department<br>Zhu, Li-yuan; the Children's Hospital Affiliated to Soochow University, Respiratory department<br>Hao, Chuang-li; the Children's Hospital Affiliated to Soochow University, Respiratory department |
| <b>Primary Subject Heading</b>: | Paediatrics                                                                                                                                                                                                                                                                                                                                                                                              |
| Secondary Subject Heading:      | Infectious diseases, Paediatrics, Radiology and imaging                                                                                                                                                                                                                                                                                                                                                  |
| Keywords:                       | Paediatric radiology < PAEDIATRICS, Paediatric thoracic medicine < PAEDIATRICS, Paediatric infectious disease & immunisation < PAEDIATRICS                                                                                                                                                                                                                                                               |
|                                 |                                                                                                                                                                                                                                                                                                                                                                                                          |

SCHOLARONE™  
Manuscripts

only

1  
2  
3 **Differentiation between mycoplasma and viral community-acquired pneumonia**

4  
5  
6 **in children with lobe or multi foci infiltration: a retrospective case study**

7  
8 **Wan-liang Guo\*<sup>a</sup>, Jian Wang\*<sup>b</sup>, Li-yuan Zhu<sup>c</sup>, Chuang-li Hao\*\*<sup>c</sup>**

9  
10 **<sup>a</sup> Radiology department, the Children's Hospital Affiliated to Soochow University,**  
11 **Suzhou , China, 215003**

12  
13 **<sup>b</sup> General surgery department, the Children's Hospital Affiliated to Soochow**  
14 **University, Suzhou , China, 215003**

15  
16 **<sup>c</sup> Respiratory department, the Children's Hospital Affiliated to Soochow**  
17 **University, Suzhou , China, 215003**

18  
19  
20  
21 \* Wan-liang Guo and Jian Wang contributed equally to this work.

22  
23  
24 \*\*Correspondence authors: Chuang-li Hao, Phone:+8615950011521

25  
26 Fax:+8651265224492, E-mail:clhaosuzhou@163.com

**ABSTRACT**

**Objectives:** The aim of this paper seeks to analyze the clinical features, inflammatory markers, and radiographs of community-acquired pneumonia (CAP) cases with lobe or multi foci infiltration; with a special focus on factors which allow the differential diagnosis of viral and mycoplasma pneumonia.

**Setting:** This is a retrospective chart review of CAP cases in a large University teaching hospital.

**Participants:** 126 pediatric CAP cases, with lobe or multi foci infiltration, presenting between May 2012 and April 2013. Demographic data, clinical presentation upon admission or referral, laboratory tests, prior history, and radiography were collected for each case if available.

**Primary and secondary outcome measures:** We used univariate and multivariate logistic regression to determine the significant factors which allow the differential diagnosis of viral and mycoplasma CAP with lobe or multi foci infiltration.

**Results:** Overall, there were 71 (56%) male and 55 (44%) female CAP cases with lobar or multi foci infiltration. Seventy pneumonia cases were caused by *Mycoplasma pneumoniae* and eighteen by viruses. Univariate analysis of the mycoplasma and viral causes of the CAP revealed that increased respiratory rate, wheeze, male gender, and lymphocyte percentage were the factors associated with the differentiation of mycoplasma and viral etiologies of pneumonia ( $P < 0.05$ ). A stepwise logistic regression analysis was performed to assess independent factors which allow the differential diagnosis of viral and mycoplasma pneumonia. Increased respiratory rate,

1  
2  
3 wheeze, and lymphocyte percentage were reliable independent factors which allow  
4  
5  
6 the differential diagnosis of viral and mycoplasma CAP with lobar or multi foci  
7  
8  
9 infiltration.

10  
11 **Conclusions:** Whether the CAP with lobar or multi foci infiltration was caused by  
12  
13 mycoplasma species or viruses could not be inferred from the radiological patterns.  
14  
15 Wheeze, lymphocyte percentage, and respiratory rate were independent factors which  
16  
17 allowed the differential diagnosis of viral and mycoplasma CAP with lobar or multi  
18  
19 foci infiltration.  
20  
21  
22  
23  
24  
25

26 **Keywords:** Community-acquired pneumonia; Children; Lobar; Multi foci; Etiology  
27  
28  
29  
30

### 31 **Strengths and limitations of this study**

32

33  
34 Over a period of 1 year, a retrospective study was carried out in our hospital. A  
35  
36 stepwise logistic regression analysis of 88 cases was performed to assess independent  
37  
38 predictors which allowed the differential diagnosis of viral and mycoplasma caused  
39  
40 CAP. Increased respiratory rate, wheeze and lymphocyte percentage were  
41  
42 significantly predictive regarding the differentiation between viral and mycoplasma  
43  
44 caused CAP with lobar or multi foci infiltration, as was viral aetiology of CAP with  
45  
46 lobar or multi foci infiltration, increase respiratory rate, wheeze and increase  
47  
48 lymphocyte percentage.  
49  
50  
51  
52

53  
54 This study has several limitations. Firstly, it was a retrospective study, and  
55  
56 therefore there may have been some selection bias. Secondly, viral pneumonia could  
57  
58  
59  
60

1  
2  
3  
4 be missed due to the sensitivity of immunofluorescence and the limited number of  
5  
6 virus we detected. Thirdly, there may be some cases in which the patient had a viral as  
7  
8 well as bacterial or a combined bacterial and mycoplasma infection which cannot be  
9  
10 detected.

### 11 12 13 **Introduction**

14  
15  
16 For the pediatric population, community-acquired pneumonia (CAP) is among the  
17  
18 most frequent causes of hospital admission. CAP remains a major cause of morbidity  
19  
20 and mortality worldwide, especially regarding children less than 5 years of age. Most  
21  
22 children with CAP live in the developing countries [1]. Viruses and mycoplasma  
23  
24 species are two main of the many pathogenic agents which can cause CAP [2, 3, 4].  
25  
26  
27

28  
29 The symptoms of community-acquired pneumonia are varying considerably  
30  
31 depending on their aetiology, its infection pattern, and the underlying medical  
32  
33 conditions. In clinical practice, most of the CAP diagnoses are based on radiography  
34  
35 and clinical symptoms. There are some reported cases in which the etiologies of CAP  
36  
37 were established on the bases clinical signs, radiological findings, or non-specific  
38  
39 inflammatory serum markers [5, 6, 7]. In radiography, most of CAP cases are  
40  
41 indicated by patchy areas of lung consolidation distributed along the lung markings,  
42  
43 and diagnosed as bronchopneumonia. However, lobe or multi foci infiltration is the  
44  
45 other two important kinds of CAP in clinical.  
46  
47  
48  
49

50  
51 Both viruses as well as mycoplasma species can lead to lobe or multi foci  
52  
53 infiltration in CAP. The therapeutic strategy for CAP cases is as controversial as it is  
54  
55 crucial. The use of antibiotics before the etiology is found out is debated. On the other  
56  
57  
58  
59  
60

1  
2  
3  
4 hand, to establish the cause of CAP cases needs time. Hence, tests must be devised  
5  
6 which allow an early differentiation between viral and mycoplasma pneumonia.  
7  
8  
9 Unfortunately, studies focusing on CAP with lobe or multi foci infiltration are yet to  
10  
11 be carried out.

12  
13  
14 Therefore, from May, 2012 to May, 2013, over a period of 1 year, a retrospective  
15  
16 study was carried out in our hospital to examine the clinical features, inflammatory  
17  
18 markers (C-Reactive Protein, white blood cell counting, and lymphocyte percentage),  
19  
20 and radiographs of CAP cases with lobe or multi foci infiltration; with a special focus  
21  
22 on factors which would allow the differential diagnosis of viral and mycoplasma  
23  
24 pneumonia.  
25  
26  
27

## 28 **Materials and Methods**

### 29 ***Study Subjects***

30  
31  
32 This study was approved by the Institutional Review Board of the Children's  
33  
34 Hospital Affiliated to Soochow University. Informed consent was enrolled and written  
35  
36 by the parents of all children. During a surveillance period of 12 months (from May,  
37  
38 2012 to April, 2013), 126 consecutive, previously healthy children with radiologically  
39  
40 confirmed lobar or multi foci infiltration of the lung were treated at our Hospital. The  
41  
42 medical charts, radiographs and laboratory findings were retrospectively reviewed by  
43  
44 both respiratory physician and radiologist. Patients with history of asthma were  
45  
46 excluded from this study.  
47  
48  
49  
50  
51  
52

53  
54 Nasopharyngeal swab specimens were routinely collected within 24 hours of  
55  
56 admission, and bronchial-aspirate samples were obtained after tracheal intubation.  
57  
58  
59  
60



1  
2  
3  
4 Respiratory specimens were tested for influenza A and B, adenovirus, respiratory  
5  
6 syncytial virus(RSV), bokavirus, human metapneumovirus (hMPV),  
7  
8 and parainfluenza virus( PIFV) 1, 2, and 3; using direct immunofluorescence assays.

9  
10  
11 Viral pneumonia was defined as acute respiratory disease with abnormal chest  
12  
13 radiograph findings and positive laboratory tests for one of the aforementioned viruses.  
14  
15 In addition, blood specimens were obtained within 24 hours of admission for bacterial  
16  
17 cultures. Other blood tests, including for C-reactive protein (CRP), white blood cells,  
18  
19 and lymphocyte percentages and neutrophil percentages, were also performed.  
20  
21

22  
23  
24 The diagnosis of mycoplasma pneumonia was based on the results from real-time  
25  
26 PCR targeting the P1 cytoadhesion type 1 and 2 genes of the *Mycoplasma*  
27  
28 *pneumoniae* genome, using DNA extracted from nasopharyngeal-swab specimens.

29  
30 mycoplasma pneumonia was defined as acute respiratory disease with abnormal chest  
31  
32 radiograph findings and positive laboratory tests combined by real-time PCR. Patients  
33  
34 with simultaneous viral and mycoplasma infections were excluded from this study.  
35  
36

### 37 38 39 **Radiography**

40  
41 The symptoms typically occurred at 4-7 days before the chest radiographs, via an  
42  
43 anteroposterior projection with the child lying. Images was independently reviewed  
44  
45 by two radiologists, when there has different opinion, they reached a diagnostic  
46  
47 conclusion by consensus. Chest radiograph findings were classified as lobar or multi  
48  
49 foci infiltration (unilateral or bilateral). The distribution of abnormalities was  
50  
51 categorized as lobar, multi foci. A lobar distribution was defined as a single lobar of  
52  
53 abnormality. If there were two or more foci(unilateral or bilateral), the distribution of  
54  
55  
56  
57  
58  
59  
60

1  
2  
3 abnormality was considered multi foci[3]. Pleural effusion was evaluated by both  
4  
5 chest radiograph and ultrasound.  
6  
7

### 8 9 *Factors Analysis*

10  
11 One hundred twenty six CAP patients were analyzed for gender, fever, wheeze,  
12  
13 increase of respiratory rate, cough, CRP, and radiological findings among three  
14  
15 different age groups namely 0-23 months, 2-4 years, and older than 5 years. Then,  
16  
17 incidence of proven viral and mycoplasma CAP was investigated. Of these 88 proven  
18  
19 CAP patients, fever, increase of respiratory rate, CRP, WBC, cough, wheeze, and  
20  
21 radiological findings were statistically analyzed.  
22  
23  
24

25  
26 The respiratory rates of the 126 patients were measured: they were age-related; The  
27  
28 respiratory rate was less than 45 per minute in children younger than 28 days old, less  
29  
30 than 40 per minute in children between 29 days and 1 year old, less than 30 per  
31  
32 minute in children between 1 and 3 years old, less than 25 per minute in children  
33  
34 between 4 and 7 years old, and less than 20 per minute in children older than 8 years.  
35  
36  
37  
38

### 39 *Statistical Analysis*

40  
41 Data are presented as number (*n*) and percentage. Univariate comparisons were  
42  
43 made using nonparametric one-way Wilcoxon rank sum, chi-squared ( $\chi^2$ ), or Fisher's  
44  
45 exact tests; depending on the statistical distribution. To evaluate the ability to  
46  
47 differentiate between mycoplasma and viral CAP cases with lobar or multi foci  
48  
49 infiltration, a stepwise logistic regression analysis was performed with the statistical  
50  
51 analysis software (SAS) 8. Probability values of P less than 0.05 were considered  
52  
53 statistically significant.  
54  
55  
56  
57  
58  
59  
60

## Results

Overall, there were 71 (56%) male and 55 (44%) female CAP cases with lobar or multi foci infiltration. The median age of the 126 patients was 4 years (range, 11 days to 14 years). The presenting signs and symptoms were fever (47.6%), wheeze (14.3%)(without history of asthma ), increase of respiratory rate (55.6%) and cough (97.6%). Fever and increase of respiratory rate are more common in the “older than 5 years” group; however, wheeze is more common in “0-23 months” group (see Table 1).

Findings in chest radiograph included lobar infiltration (see Figure 1) in 54 patients, multi foci infiltration including unilateral infiltration(see Figure 2) in 26 patients, and bilateral infiltration(see Figure 3) in 46 patients. Seven patients had pleural effusions. An analysis of the correlation between aetiology and radiography findings showed that there were no significant differences between them ( $P>0.05$ ) (Table 2).

Seventy of the CAP cases were caused by mycoplasma species and 18 by viruses, including influenza A (n=2), influenza B (n=1), adenovirus (n=2), RSV (n=9), bokavirus (n=2), and PIFV 3 (n=2). Univariate analysis revealed that the factors which allowed the differential diagnosis of viral and mycoplasma CAP were increased respiratory rate, wheeze, male, and lymphocyte percentage ( $P<0.05$ ). There were no significant differences in age, radiological findings, fever, cough, CRP, and WBC ( $P>0.05$ ) (see Table 3).

A stepwise logistic regression analysis of 88 cases was performed to assess independent predictors which allowed the differential diagnosis of viral and

1  
2  
3  
4 mycoplasma caused CAP. Increased respiratory rate, wheeze and lymphocyte  
5  
6 percentage were significantly predictive regarding the differentiation between viral  
7  
8 and mycoplasma caused CAP with lobar or multi foci infiltration (see Table 4), as was  
9  
10 viral aetiology of CAP with lobar or multi foci infiltration, increase respiratory rate,  
11  
12 wheeze and increase lymphocyte percentage. The logistic regression model was  
13  
14 consistent with the findings reported by Hosmer and Lemeshow who used the  
15  
16 goodness-of-fit test (P=0.8979).  
17  
18  
19  
20  
21  
22  
23

## 24 **Discussion**

### 25 *General Findings in Three Age Groups*

26  
27  
28 In this study, about 69.8% of the CAP cases were caused by mycoplasma species  
29  
30 or virus. The etiology of 38 cases (31.2%) could not be detected, partly because the  
31  
32 positive of bacterial pathogens in blood culture is very low. Our results are very  
33  
34 similar to those of Zhang et al. who reported 707 severe CAP cases; blood cultures  
35  
36 were positive in only 5, i.e., 0.7% [2]. This means that new methods with higher  
37  
38 sensitivities for bacterial pathogens in blood must be devised which can be routinely  
39  
40 used in all laboratories[8]. On the other hand, 55.6% of our patients had tachypnoea  
41  
42 and 47.6% had fever, and these symptoms were more common in the “older than 5  
43  
44 years” group. The CRP is higher in the “older than 5 years” group than in the other  
45  
46 two groups; maybe more infiltration foci can be found in the “older than 5 years”  
47  
48 group. Our results are similar to two other studies [9,10]. However wheeze is more  
49  
50 common in the “0-23 months” group; this finding is different from that of a recent  
51  
52  
53  
54  
55  
56  
57  
58  
59  
60

1  
2  
3  
4 study [11], partly because the sample we focus on pneumoniae with lobar or multi  
5  
6 foci infiltration.  
7

### 8 9 *Radiological Patterns between Mycoplasma and Viral CAP*

10  
11 In clinical practice, the radiographic detection of infiltrations is currently the gold  
12  
13 standard for the diagnosis of CAP. Most CAP cases are diagnosed as  
14  
15 bronchopneumonia in radiograph. However, lobe or multi foci infiltrations are the  
16  
17 other two radiological manifestations of CAP [3,11]. Some authors reported that in  
18  
19 clinical practice lobar infiltrations are often caused by bacteria [6]. However, in this  
20  
21 study, 69.8% of the CAP case was caused by viruses and mycoplasma species:  
22  
23 especially, mycoplasma associated with etiological findings, it account 55.6% in this  
24  
25 group. This finding is consistent with some previous studies [3,12]. In our study, there  
26  
27 were 41 CAP cases with bilateral infiltrations and 61 CAP cases with multi foci.  
28  
29 When analysis on distribution and the number of focus. There is no significant  
30  
31 difference associating with etiological findings. Even some of cases with pleural  
32  
33 effusion, there is no significant difference associating with etiological findings. This  
34  
35 means that whether the CAP with lobar or multi foci infiltration was caused by  
36  
37 mycoplasma species or viruses could not be inferred from the radiological patterns. In  
38  
39 a recent study about pediatric CAP, Korppi et al. analyzed the clinical or radiological  
40  
41 characteristics of 101 CAP cases, and they concluded that radiographs are not helpful  
42  
43 when it comes to differentiating between viral, pneumococcal, and atypical bacterial  
44  
45 aetiology of CAP in children [11]. This conclusion coincides with our results:  
46  
47  
48  
49  
50  
51  
52  
53  
54  
55

56 Radiological pattern did not allow a reliable differentiation between mycoplasma and  
57  
58  
59  
60

1  
2  
3  
4  
5  
6  
7  
8  
9  
10  
11  
12  
13  
14  
15  
16  
17  
18  
19  
20  
21  
22  
23  
24  
25  
26  
27  
28  
29  
30  
31  
32  
33  
34  
35  
36  
37  
38  
39  
40  
41  
42  
43  
44  
45  
46  
47  
48  
49  
50  
51  
52  
53  
54  
55  
56  
57  
58  
59  
60

viral CAP.

### ***Related Factors between Mycoplasma and Viral CAP***

To investigate potential factors that may allow differentiating between viral and mycoplasma CAP is very important for clinical practice. In this study, our aim was to describe the utility of some laboratory markers and clinical features regarding the differentiation between mycoplasma and viral CAP with lobar or multi foci infiltrations. Univariate analysis showed that findings such wheeze, lymphocyte percentage, respiratory rate, and sex can help to differentiate between mycoplasma and viral CAP with lobar or multi foci infiltration. Furthermore, multiple logistic regression showed that wheeze, increase of lymphocyte percentage, and increase of respiratory rate are independent factors which allow to differentiate between mycoplasma and viral CAP with lobar or multi focus infiltration. This means that among mycoplasma and viral CAP with lobar or multi foci infiltration, wheeze, increase of lymphocyte percentage, and increase of respiratory rate can help to diagnose viral pneumonia.

Hatipoğlu et al. [13] reported 147 viral CAP cases, and they found that the prominent symptoms of the patients were cough (88.9%) and wheeze (72.2%). This is similar to our results. In another report [11], 101 CAP cases were analyzed. Although the report lacked data on respiratory rate in 20 cases, it included supplementary sensitivity analyses by adding the cases with missing data as non-tachypnoea cases in the analyses. Moreover, the report concluded that tachypnoea is not associated with the aetiology of CAP. The above study is different from our findings. The reason may

1  
2  
3  
4 be that we used multiple factor analysis and selected mycoplasma and viral CAP with  
5  
6  
7  
8  
9  
10  
11  
12  
13  
14  
15  
16  
17  
18  
19  
20  
21  
22  
23  
24  
25  
26  
27  
28  
29  
30  
31  
32  
33  
34  
35  
36  
37  
38  
39  
40  
41  
42  
43  
44  
45  
46  
47  
48  
49  
50  
51  
52  
53  
54  
55  
56  
57  
58  
59  
60

be that we used multiple factor analysis and selected mycoplasma and viral CAP with  
lobar or multi foci infiltration as our object of study.

Youn et al. [9] reported 95 *Mycoplasma pneumoniae* cases with segmental or lobar  
infiltrations. They found that the lymphocyte percentage was at a normal level.  
Defilippi et al. [10] reported 102 CAP cases with a positive PCR for *Mycoplasma  
pneumoniae*: they found that the lymphocyte percentage (median) is at normal level, a  
result similar to ours. Hatipoğlu et al. [13] reported 147 cases with pneumonia, the  
percentage of polymorphonuclear leukocytes the viral pneumonia cases was lower  
than patients virus not isolated, it suggests that Lymphocyte percentage may be higher  
in pneumonian in acute phase of pneumonia. The above-mentioned literature suggests  
that viral pneumonia often presents a higher percentage of lymphocyte. This  
conclusion is similar to our results.

### ***Limitations***

This study has several limitations. Firstly, it was a retrospective study, and  
therefore there may have been some selection bias. Secondly, viral pneumonia could  
be missed due to the sensitivity of immunofluorescence and the limit number of virus  
we detected. Thirdly, there may be some cases in which the patient had a viral as well  
as bacterial or a combined bacterial and mycoplasma infection which cannot be  
detected. Therefore, prospective further, preferably prospective studies on CAP with  
lobar or multi foci infiltration are needed.

### ***Conclusions***

In conclusion, more than half of the CAP cases with lobar or multi foci infiltration

1  
2  
3  
4 are caused by mycoplasma species or viruses. Whether the CAP with lobar or multi  
5  
6 foci infiltration was caused by mycoplasma species or viruses could not be inferred  
7  
8 from the radiological patterns. We found that wheeze, lymphocyte percentage, and  
9  
10 respiratory rates were independent factors which allow the differential diagnosis of  
11  
12 viral and mycoplasma caused CAP with lobar or multi foci infiltration, as was viral  
13  
14 aetiology of CAP with lobar or multi foci infiltration, increase respiratory rate,  
15  
16 wheeze and increase lymphocyte percentage.  
17  
18  
19

20  
21 ***Authors' Contributions:***  
22

23  
24 Chuang-li Hao participated in study design and paper writing. Wan-liang Guo and  
25  
26 Jian Wang participated in data collection and paper writing. Li-yuan Zhu  
27  
28 participated in data collection and analysis. All authors read and approved the final  
29  
30 manuscript.  
31  
32

33  
34 ***Competing interests:***  
35

36 The authors declare that they have no competing interests.  
37

38  
39 ***Funding:***  
40

41 There are no funders to report for this paper.  
42  
43

44  
45 ***Data Sharing Statement:***  
46

47 No additional data available.  
48  
49  
50  
51  
52

53  
54 **Reference:**  
55

56 [1] Rudan I, Boschi-Pinto C, Biloglav Z, et al. Epidemiology and etiology of  
57  
58  
59  
60



1  
2  
3  
4  
5  
6  
7  
8  
9  
10  
11  
12  
13  
14  
15  
16  
17  
18  
19  
20  
21  
22  
23  
24  
25  
26  
27  
28  
29  
30  
31  
32  
33  
34  
35  
36  
37  
38  
39  
40  
41  
42  
43  
44  
45  
46  
47  
48  
49  
50  
51  
52  
53  
54  
55  
56  
57  
58  
59  
60

childhood pneumonia. Bull World Health Organ 2008;86(5):408-16.

[2] Zhang Q1, Guo Z, Bai Z, et al. A 4 year prospective study to determine risk factors for severe community acquired pneumonia in children in southern China. *Pediatr Pulmonol* 2013; 48(4):390-7.

[3] Guo W, Wang J, Sheng M, et al. Radiological findings in 210 paediatric patients with viral pneumonia: a retrospective case study. *Br J Radiol* 2012;85(1018):1385-9.

[4] Cardinale F1, Cappiello AR, Mastrototaro MF, et al. Community-acquired pneumonia in children. *Early Hum Dev* 2013; 89 Suppl 3:S49-52.

[5] Don M, Valent F, Korppi M, et al. Differentiation of bacterial and viral community-acquired pneumonia in children. *Pediatr Int* 2009;51(1):91-6.

[6] Virkki R, Juven T, Rikalainen H, et al. Differentiation of bacterial and viral pneumonia in children. *Thorax* 2002; 57(5):438-41.

[7] Korppi M. Non-specific host response markers in the differentiation between pneumococcal and viral pneumonia: what is the most accurate combination? *Pediatr Int* 2004; 46(5):545-50.

[8] Esposito S, Marchese A, Tozzi AE, et al. Bacteremic pneumococcal community-acquired pneumonia in children less than 5 years of age in Italy. *Pediatr Infect Dis J* 2012; 31(7):705-10.

[9] Youn YS, Lee KY, Hwang JY, et al. Difference of clinical features in childhood *Mycoplasma pneumoniae* pneumonia. *BMC Pediatr* 6; 10:48.

[10] Defilippi A, Silvestri M, Tacchella A, et al. Epidemiology and clinical features

1  
2  
3  
4 of *Mycoplasma pneumoniae* infection in children. *Respir Med* 2008; 102(12):1762-8.

5  
6 [11] Korppi M, Don M, Valent F, et al. The value of clinical features in  
7  
8 differentiating between viral, pneumococcal and atypical bacterial pneumonia in  
9  
10 children. *Acta Paediatr* 2008; 97(7):943-7.

11  
12  
13 [12] Lee I, Kim TS, Yoon HK. *Mycoplasma pneumoniae* pneumonia: CT features in  
14  
15 16 patients. *Eur Radiol* 2006; 16(3):719-25.

16  
17  
18 [13] Hatipoğlu N1, Somer A, Badur S, et al. Ünüvar E. Viral etiology in hospitalized  
19  
20 children with acute lower respiratory tract infection. *Turk J Pediatr* 2011;  
21  
22 53(5):508-16.  
23  
24  
25  
26  
27  
28  
29  
30  
31  
32  
33

### 34 **Figure Legends**

35  
36  
37 Figure 1. An example of right middle lobe infiltration from a chest radiograph  
38  
39 obtained 6 days after the onset of symptoms in a patient with influenza B.

40  
41  
42 Figure 2. An example of right upper and middle lobe infiltration from a chest  
43  
44 radiograph obtained 5 days after the onset of symptoms in a patient with mycoplasma  
45  
46 pneumonia.  
47  
48

49  
50 Figure 3. An example of bilateral infiltration in the left upper zone, the right upper  
51  
52 zone and middle zone from a chest radiograph taken 4 days after the onset of  
53  
54 symptoms in a patient with influenza A.  
55  
56  
57  
58  
59  
60

**Table 1.** Clinical signs and symptoms in 126 children with CAP, in relation to the age

| symptoms                  | 0–23         | 2–4         | ≥5 years | P value | Total(n=126) |
|---------------------------|--------------|-------------|----------|---------|--------------|
|                           | months(n=34) | years(n=39) | (n=53)   |         |              |
| fever >37.5°C             | 7            | 22          | 31       | 0.0011  | 60           |
| wheeze                    | 13           | 2           | 3        | <0.0001 | 18           |
| increase respiratory rate | 12           | 17          | 41       | 0.0001  | 70           |
| cough                     | 32           | 38          | 53       | 0.2131  | 123          |
| CRP(>8)                   | 10           | 27          | 39       | <0.0001 | 76           |
| lobar infiltration        | 11           | 18          | 25       | 0.9524  | 54           |
| unilateral infiltration   | 5            | 8           | 13       | 0.9524  | 26           |
| (multiple)                |              |             |          |         |              |
| bilateral infiltration    | 18           | 13          | 15       | 0.0587  | 46           |
| pleural effusion          | 1            | 2           | 4        | 0.8847  | 7            |
| sex(M)                    | 24           | 16          | 31       | 0.0364  | 71           |

**Table 2.** Radiological findings of CAP in children with lobe or multi foci infiltration

| radiological findings   | aetiology of pneumonia |          |                | P value | Total patients |
|-------------------------|------------------------|----------|----------------|---------|----------------|
|                         | M (n=70)               | V (n=18) | unknown (n=38) |         |                |
| lobar infiltration      | 28                     | 7        | 19             | 0.8864  | 54             |
| unilateral infiltration | 15                     | 3        | 8              | 0.8864  | 26             |
| (multiple)              |                        |          |                |         |                |
| bilateral infiltration  | 27                     | 8        | 11             | 0.5192  | 46             |
| pleural effusion        | 5                      | 1        | 1              | 1.0000  | 7              |

M= mycoplasma      V= viral

**Table 3.** Clinical signs in relation to the aetiology of pneumonia, viral aetiology Vs mycoplasma

| findings                               | M (n=70) | V (n=18) | P value |
|----------------------------------------|----------|----------|---------|
| fever >37.5°C                          | 42       | 7        | 0.1078  |
| wheeze                                 | 3        | 8        | <0.0001 |
| increase respiratory rate              | 29       | 14       | 0.0053  |
| cough                                  | 69       | 16       | 0.1050  |
| CRP(>8)                                | 44       | 9        | 0.2231  |
| WBC(increase)                          | 17       | 6        | 0.4359  |
| increase lymphocyte percentage         | 10       | 7        | 0.0184  |
| increase polymorphonuclears percentage | 19       | 4        | 0.6717  |
| radiograph                             |          |          |         |
| multi foci infiltration (unilateral)   | 15       | 3        | 0.7690  |
| multi foci infiltration (bilateral)    | 27       | 8        | 0.6498  |
| sex(M)                                 | 29       | 13       | 0.0197  |
| age (>5 years)                         | 32       | 6        | 0.3442  |

M= mycoplasma      V= viral

**Table 4.** Stepwise logistic regression model for significant predictors of viral aetiology of CAP showing lobar or multi foci infiltration

| variable                       | Chi-Square | OR    | 95%Wald Confidence Limits | P value |
|--------------------------------|------------|-------|---------------------------|---------|
| wheeze                         | 23.0077    | 0.063 | 0.010-0.271               | <0.0001 |
| increase respiratory rate      | 6.7243     | 0.093 | 0.013-0.653               | 0.0095  |
| increase lymphocyte percentage | 8.9954     | 0.053 | 0.012-0.337               | 0.0027  |

Hosmer and Lemeshow Goodness-of-Fit Test (p=0.8979)

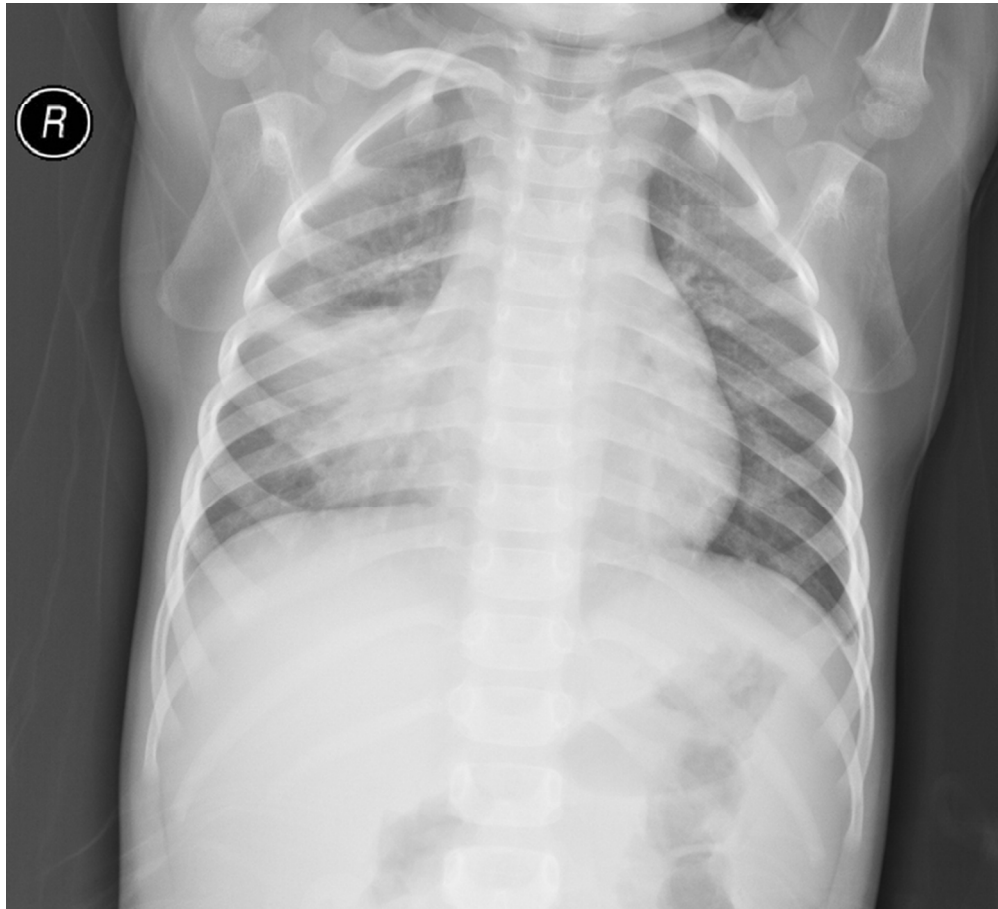

Figure 1. An example of right middle lobe infiltration from a chest radiograph obtained 6 days after the onset of symptoms in a patient with influenza B.  
76x69mm (300 x 300 DPI)

only

1  
2  
3  
4  
5  
6  
7  
8  
9  
10  
11  
12  
13  
14  
15  
16  
17  
18  
19  
20  
21  
22  
23  
24  
25  
26  
27  
28  
29  
30  
31  
32  
33  
34  
35  
36  
37  
38  
39  
40  
41  
42  
43  
44  
45  
46  
47  
48  
49  
50  
51  
52  
53  
54  
55  
56  
57  
58  
59  
60



Figure 2. An example of right upper and middle lobe infiltration from a chest radiograph obtained 5 days after the onset of symptoms in a patient with mycoplasma pneumonia. 87x91mm (300 x 300 DPI)

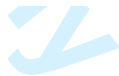



Figure 3. An example of bilateral infiltration in the left upper zone, the right upper zone and middle zone from a chest radiograph taken 4 days after the onset of symptoms in a patient with influenza A.  
53x33mm (300 x 300 DPI)
